# Supplementary material for: Fibroblasts from different body parts exhibit distinct phenotypes in adult progeria Werner syndrome
Source: Aging (Albany NY). 2021 Feb 24;13(4):4946–61. doi: 10.18632/aging.202696 (PMC7950285; doi:10.18632/aging.202696)
Supplement: Supplementary Figures [file aging-13-202696-s001.pdf]

SUPPLEMENTARY FIGURES

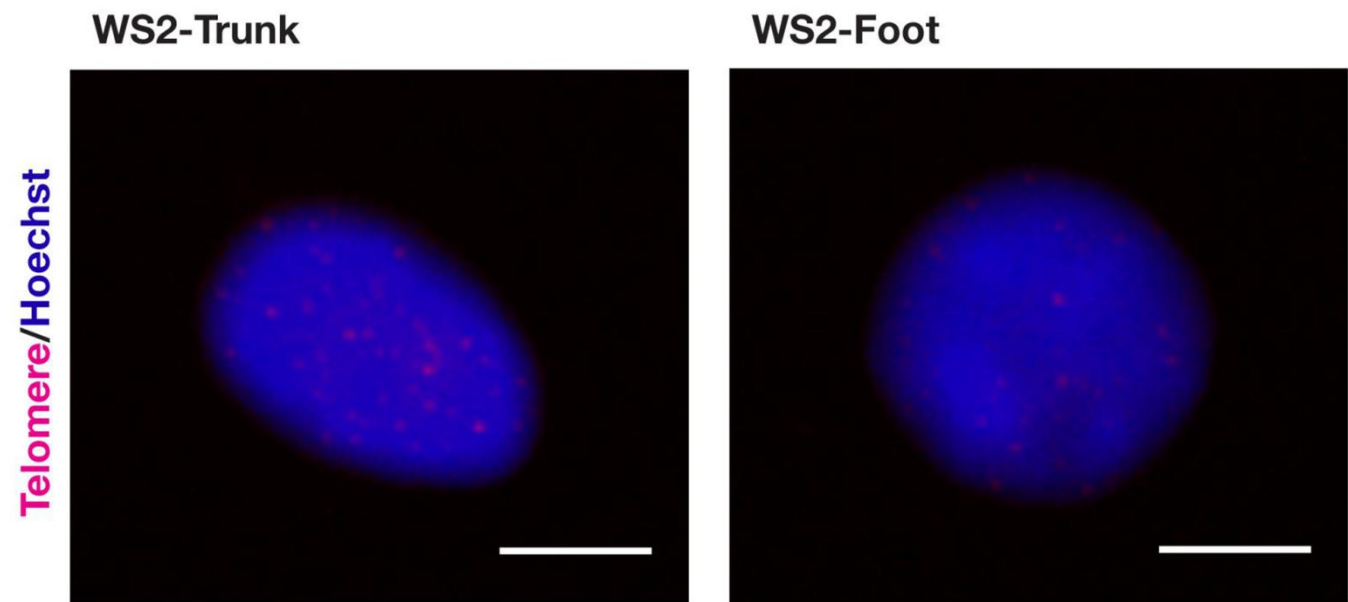

Supplementary Figure 1. Representative image of telomere Q-FISH of WS2. Bar = 10  $\mu$ m.

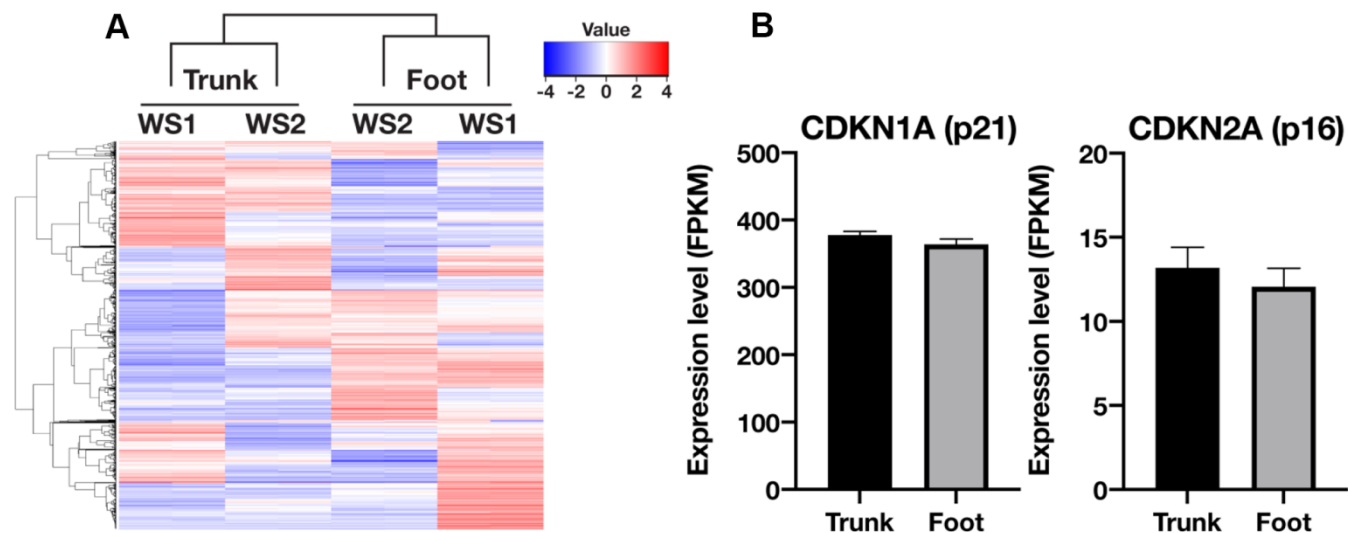

Supplementary Figure 2. Results of transcriptome analysis of the trunk and foot fibroblasts. (A) Heatmap of the hierarchical clustering analysis. (B) FPKM results of CDKN1A (p21) and CDKN2A (p16). Data are means  $\pm$  SEM of two patients (technically n=2 in each sample).

**WS2-Trunk**

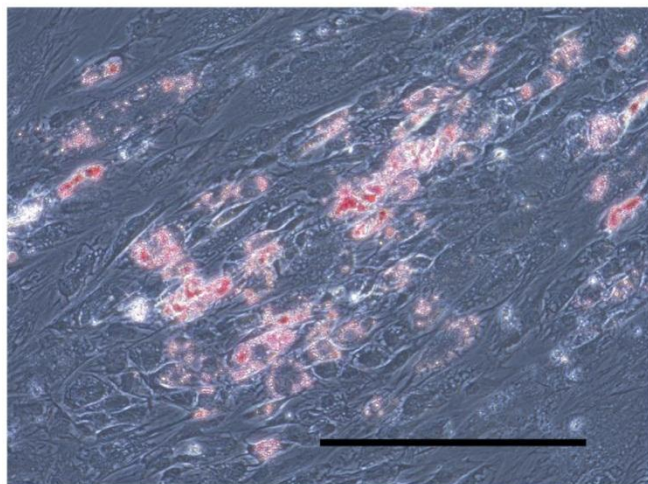

**WS2-Foot**

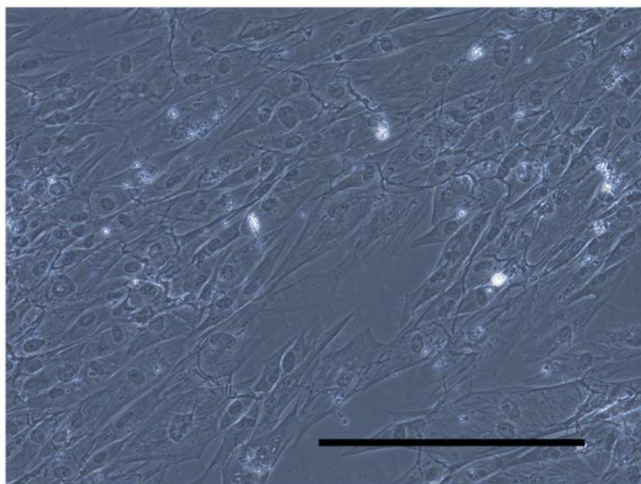

**Supplementary Figure 3. Representative images of Oil red O staining two weeks after induction of adipogenesis in the trunk and foot fibroblasts of WS2. Bar = 300  $\mu$ m.**

**WS2-Trunk**

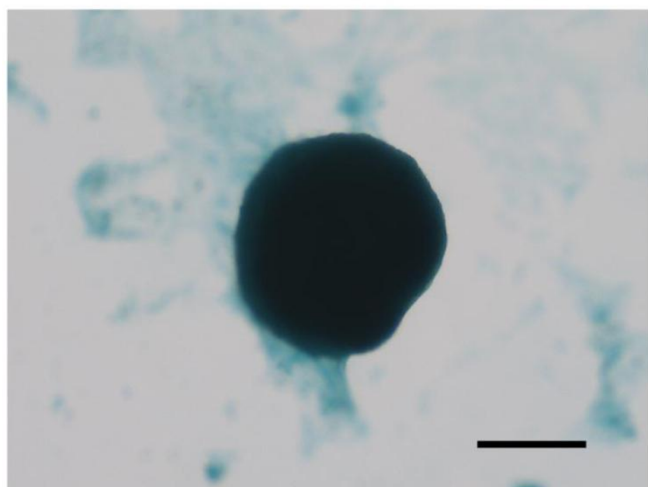

**WS2-Foot**

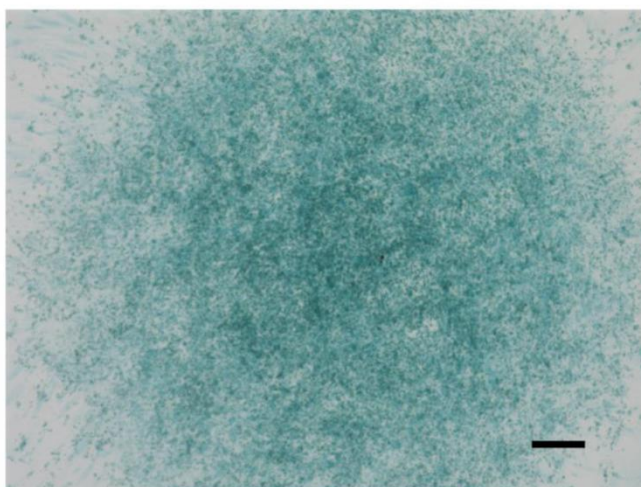

**Supplementary Figure 4. Representative images of Alcian blue staining two weeks after induction of chondrogenesis in the trunk and foot fibroblasts of WS2. Bar = 300  $\mu$ m.**

**WS2-Trunk**

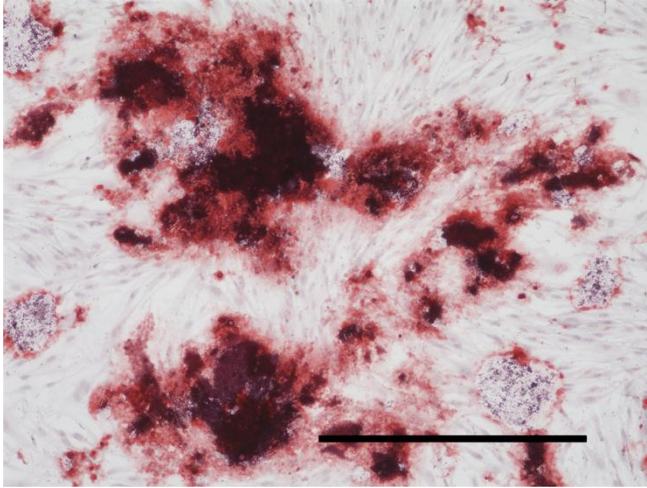

**WS2-Foot**

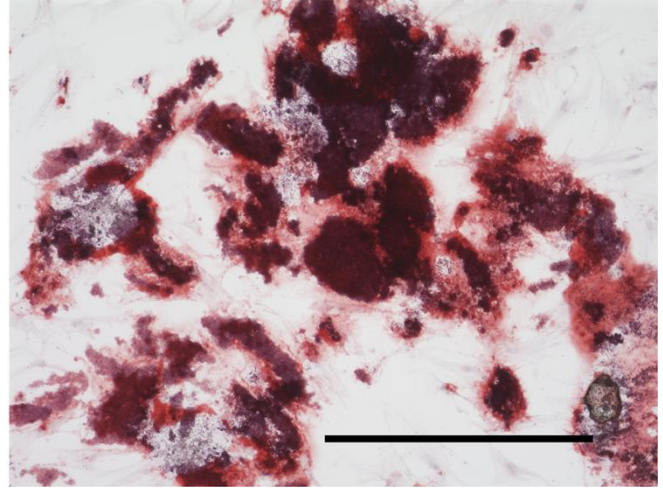

**Supplementary Figure 5. Representative images of Alizarin red staining two weeks after induction of osteogenesis in the trunk and foot fibroblasts of WS2. Bar = 300  $\mu$ m.**
