# Supplementary material for: Fibroblasts from different body parts exhibit distinct phenotypes in adult progeria Werner syndrome
Source: Aging (Albany NY). 2021 Feb 24;13(4):4946–61. doi: 10.18632/aging.202696 (PMC7950285; doi:10.18632/aging.202696)
Supplement: Supplementary Table 1 [file aging-13-202696-s002.xls]

## Sheet: Supplementary Table S1
Supplementary Table 1. Raw data of hierarchical clustering analysis heatmap. Each value is represented as log2(FPKM+1).
Gene Symbol	WS1-Trunk_2 log2(FPKM+1)	WS1-Trunk_1 log2(FPKM+1)	WS2-Trunk_1 log2(FPKM+1)	WS2-Trunk_2 log2(FPKM+1)	WS2-Foot_1 log2(FPKM+1)	WS2-Foot_2 log2(FPKM+1)	WS1-Foot_2 log2(FPKM+1)	WS1-Foot_1 log2(FPKM+1)
CLDN11	7.62268	7.6285	8.65112	8.69385	7.17169	7.14879	1.56872	1.91926
FAM19A5	4.18863	4.10332	4.71333	4.78452	4.01499	3.88094	1.68993	1.71277
KIT	1.88914	2.03659	2.39505	2.41126	2.18051	2.14644	0.689452	0.437113
SLC25A23	3.82551	3.85862	4.06345	4.105	4.16944	4.09182	2.52102	2.36038
SKAP2	3.41029	3.37773	3.8697	3.86651	3.57651	3.64949	1.29176	1.28113
HOXB2	4.0425	3.71984	4.24871	4.19786	3.86896	3.83922	0	0.116091
PTN	4.56127	4.48089	4.81569	4.37398	4.70773	4.7023	2.46898	2.8485
CDH8	1.44843	1.69694	1.30232	1.5528	1.63173	1.87475	0.167493	0.167707
ACE	2.20025	2.29078	2.18606	2.32149	2.58496	2.68604	1.02451	0.914109
ISLR	7.28495	7.35039	7.52471	7.50491	8.22441	8.24868	5.16109	5.24564
PSG5	6.17923	6.2367	7.17164	7.14546	6.77367	6.7247	5.55593	5.53082
LYNX1-SLURP2	2.92989	3.01728	3.87128	3.84425	3.24944	3.3774	1.9541	1.8583
SEMA3A	2.92047	2.9051	4.18012	4.15454	3.4806	3.51295	1.20613	1.28552
LIPC	1.86588	1.53723	1.20761	1.26314	1.48608	1.52396	0	0.416512
PCDHGA12	3.96012	4.02875	3.30039	3.26275	4.07222	4.12667	2.20045	2.28039
MEIS1	3.60744	3.50348	2.86359	3.16663	3.97274	3.7989	1.5089	1.56872
TRIM16L	2.61831	2.52438	1.82495	2.17422	2.33933	2.52383	1.2114	0.991363
CHRM2	3.70986	3.58445	2.31821	2.33039	3.3415	3.28294	0.342361	0.189659
PPP1R3C	6.15303	6.1149	4.8861	4.73553	5.65204	5.70098	3.07955	3.05578
BDKRB1	3.18975	3.51767	3.22631	3.22935	2.92311	2.79377	0.512666	0.971843
DKK2	2.19243	2.18255	1.94355	1.71484	1.78071	1.6902	0.494335	0.659685
MEIS2	5.43443	5.42337	4.46886	4.51542	4.68672	4.70486	2.42989	2.47009
HSPA12A	1.96815	1.90572	2.06599	1.9576	3.11772	3.17681	1.2872	1.28836
PITX2	2.18913	2.11395	2.78023	2.40986	3.91351	3.81499	1.31858	1.25213
C16orf74	1.7399	1.50587	2.12252	1.86971	3.07913	2.82833	1.23382	1.33511
PYCARD	3.55993	3.44047	3.79781	3.98905	4.56625	4.23023	2.57088	2.62167
SLC38A4	2.70511	2.7602	2.71164	2.92113	3.83994	3.83242	1.00748	1.05452
PLXNB3	2.21932	2.20827	2.30575	2.22275	3.07755	3.06279	1.36496	1.35521
SFRP2	1.07121	1.07174	1.11313	1.7363	2.13777	2.55031	0.0915124	0.409123
CD40	2.3918	2.34421	1.46567	1.13988	1.90107	2.48066	0.678795	1.21124
C7orf69	1.33101	1.46971	0.555636	0.341954	1.45636	1.80173	0	0
PCDHGB7	2.99538	2.89814	0.757916	1.09807	2.38537	2.63981	0.606401	1.25274
COLEC12	5.39406	5.30711	3.7646	3.82844	5.25787	5.28734	3.72367	3.64481
AFF3	1.75105	1.68778	1.01302	1.20094	2.32721	2.46227	0.54366	0.484543
PCDHGA11	1.87929	1.77158	1.60818	1.30678	2.5363	2.73682	0.863374	0.936517
NTF3	3.3947	3.60439	2.08503	2.44667	4.19653	4.16707	1.75688	2.36951
EIF4EBP3	4.07313	4.0573	2.95632	2.53759	3.33033	3.62661	2.90443	2.44403
EVI2B	2.08057	2.01367	0.348136	0.564362	0.970709	1.22558	0.725118	0.54374
GRIA1	2.61263	2.66627	0.308903	0.235396	1.34452	1.42115	0.94916	0.916843
CCN4	3.28235	3.29851	1.63016	1.67966	2.34133	2.47944	2.29227	2.14682
FGD5	1.86407	2.12219	0.0899839	0.0901906	1.30375	1.21579	0.24464	0.269763
COL5A3	5.95977	6.00324	4.32815	4.37482	5.26058	5.2413	4.60058	4.57067
PCDHGA10	3.11115	2.98973	0.99812	0.963191	2.16861	1.98058	0.771832	0.730903
PIM1	4.75217	4.71558	2.27884	2.12867	3.44354	3.38908	2.24317	2.28678
MAB21L1	5.21388	5.29729	2.52246	2.19501	3.4261	3.27761	2.15726	2.29235
MEF2B	0.104747	2.1097	1.043	0.40355	1.1746	1.73275	0.000947284	1.98112
EFEMP1	9.47027	9.46465	8.2461	8.22151	3.07993	3.11948	7.97699	7.98154
OAF	7.05707	7.04364	6.42352	6.4672	4.35219	4.07941	6.29259	6.34304
A4GALT	4.31268	4.30472	4.13492	3.99286	2.66479	2.56005	4.01585	4.2137
TES	4.45846	4.51485	4.52272	4.43735	2.32189	2.18706	3.8236	3.87043
KLF4	4.17628	4.06108	3.98343	3.88513	1.94665	1.8111	3.39394	3.39571
GALNT6	2.69278	2.60105	2.95145	2.73225	0.986943	0.964742	2.33223	2.46716
TPD52L1	4.39941	4.32573	4.63368	4.42864	2.07131	2.23743	3.99438	3.80177
CLIC3	4.52796	4.65422	4.76158	4.807	0.249107	0.248214	3.73448	3.67235
NYNRIN	2.00774	2.0085	1.98263	2.08102	0.53502	0.503243	1.71182	1.75953
PLAC9	5.93255	5.95097	5.86914	5.77242	3.103	3.36037	5.37472	5.60151
CRLF1	7.1224	7.15964	7.28589	7.27509	3.16208	3.27873	7.50788	7.49469
LRRC32	5.44971	5.55914	5.63029	5.63515	3.55781	3.73185	5.85129	5.82639
MBP	2.82712	2.83518	2.8594	3.04029	1.20205	1.35095	2.96491	2.79326
DEPTOR	3.7093	3.76176	4.04198	4.19152	1.05906	1.32291	3.96058	3.86566
PTGES	3.91709	3.86832	4.29886	4.31899	1.93496	1.72589	4.33713	4.16545
HSPB7	6.14022	6.15697	6.3693	6.37505	3.94547	3.86652	6.29812	6.30324
HSPB8	3.82028	4.11188	4.33867	4.19941	2.02127	1.74377	3.71855	3.76252
EBF2	1.38412	1.37098	1.68886	1.71446	0	0	1.26448	1.50112
SLC22A23	2.87305	3.01706	3.39462	3.18124	1.42932	1.46988	3.09984	2.96172
TBX15	3.28539	3.42974	3.50534	3.52721	2.03494	1.74752	2.3664	2.6877
PAMR1	5.64668	5.71396	5.94451	6.03463	2.17683	2.28382	3.66337	3.62023
SLC40A1	2.09306	1.8214	2.17881	2.14391	0.0515211	0	0.76977	0.947771
PEAR1	4.81045	4.71247	5.58181	5.56449	1.02285	1.28922	3.20158	3.19544
DUSP1	5.87414	5.79806	6.11301	6.1659	4.58393	4.63059	4.92752	4.94457
KRT7	5.80326	5.8142	6.95458	6.935	0.688954	0.616839	1.741	1.6375
SPEG	4.19273	4.1077	4.34105	4.40762	2.69696	2.8732	3.16422	3.15246
CDO1	1.89072	2.0429	2.24105	2.13379	0.11276	0	0.32066	0.413942
EBF1	3.36209	3.42844	3.40892	3.42996	1.91188	2.22962	2.37728	2.53633
PAPPA	3.21904	3.30554	3.2247	3.25378	0.99995	0.926504	1.5197	1.60071
AKR1C3	5.51202	5.56833	5.4878	5.2113	2.91082	2.79394	3.75554	3.54657
MARCKSL1	3.39189	3.24543	3.31304	3.22081	1.49656	1.77316	2.51997	2.47183
TCEAL7	3.91239	3.79547	3.71184	3.61545	0	0	1.85892	1.48223
PTPRN	2.16564	2.24213	2.03393	1.91281	0.046536	0	0.957762	1.24059
CDK15	2.01271	2.10018	1.86275	1.79938	0.266827	0.45525	1.01093	1.21103
LMOD1	5.25955	5.26401	4.92641	4.92199	2.78141	2.8144	3.8219	3.95396
KCND2	1.4756	1.51092	1.52666	1.6101	0.063039	0.0317409	0.985527	0.865215
CELF2	2.82706	2.8256	2.99158	2.89623	0.542105	0.597355	1.78498	1.80034
SEMA3F	2.60832	2.50646	2.68294	2.5558	0.844421	0.499218	1.72008	1.67429
FNBP1L	2.62191	2.51455	2.3654	2.54389	1.039	1.11615	1.9753	1.82939
PTGS1	3.89016	4.00847	3.79014	3.9244	2.42321	2.31107	3.31269	3.23763
STAT1	7.92444	7.9067	7.69044	7.66373	6.10942	6.08357	7.09738	7.12267
INMT	1.61487	1.63954	2.05818	2.00579	0	0.255782	1.42755	1.13367
SBSN	3.18496	2.95489	3.00432	3.35559	1.34957	1.67019	2.56453	2.41948
IRX1	3.177	3.06176	2.69321	2.55777	0.570502	0.757203	2.08848	1.61051
ATF3	2.51433	2.31016	1.92839	1.79062	0.616975	0.687268	1.86976	1.1793
INSYN1	2.64476	2.58215	1.82714	1.80415	0.48628	0.499992	1.1259	1.24574
APOL3	3.26066	3.15759	2.70828	2.50846	1.54096	1.59555	2.08009	2.07136
SGK1	6.83136	6.83162	5.97988	6.03409	4.17115	4.25532	5.07539	5.09011
CLEC3B	7.4029	7.34955	5.71998	5.70868	2.00387	2.38789	3.91631	3.52326
PRUNE2	2.53451	2.45301	1.8449	1.88738	0.038447	0.0382995	1.03867	1.32231
PKDCC	3.60036	3.75997	2.59765	2.79036	0.432081	0.376433	1.82597	1.80651
IFIT2	3.58906	3.7342	3.02264	3.13355	1.75149	1.83425	2.4532	2.64731
ZFP36	6.30846	6.32839	5.61706	5.77017	4.40688	4.5497	5.21411	5.29322
PROS1	4.13019	4.0136	3.37452	3.35221	2.27334	2.46709	3.20282	3.14925
PPL	3.70206	3.72618	2.12428	2.0155	0.0537557	0.105183	1.48627	1.59334
PTGFR	4.02239	3.96802	2.90505	2.95896	1.67775	1.67905	2.51496	2.50508
TGFBI	11.1495	11.1386	10.3542	10.3565	9.36752	9.35591	10.0577	10.0472
SYTL2	4.38579	4.57616	3.38691	3.31499	1.62359	1.57847	2.86256	2.91338
ACTC1	3.80321	3.87108	2.66027	2.43875	0.0917564	0.0464286	1.65287	1.62311
SERPING1	7.12864	7.13247	5.64902	5.63472	4.18204	4.2805	5.79167	5.70553
CYP1B1	7.17497	7.14341	4.17417	4.17146	1.22798	1.22474	4.12824	3.96509
ARL4C	5.98789	5.92337	4.93796	5.00756	3.7574	3.86376	4.98772	5.03057
FAM167B	3.78482	3.66826	3.05666	2.8142	1.84542	1.9588	2.94396	2.91617
HEG1	6.06293	6.11244	5.68539	5.63932	4.33741	4.44778	5.40031	5.40623
MEST	5.58232	5.45457	3.83796	3.91835	0.729347	0.58997	3.73444	3.68782
CSDC2	3.09739	3.27184	2.19275	2.16186	0.198847	0.31654	2.04159	2.1119
FBXO32	5.2633	5.18547	4.21561	4.20486	2.02124	2.20597	4.03912	4.06785
CNN1	6.16227	6.09802	4.56992	4.49854	1.46711	1.65869	4.41932	4.42032
ID4	3.64327	3.62222	2.33865	2.13784	0.5538	0.489514	2.64463	2.50757
SLC43A3	3.83685	4.03733	3.11584	3.03726	1.74242	1.52159	3.21263	3.24913
ADAM12	5.93479	5.97436	6.01775	6.01666	5.18529	5.21938	4.24251	4.25406
GBP2	2.41349	2.40632	2.35181	2.50473	1.73682	1.69455	0.752356	0.727414
HOXD8	3.39441	3.49317	3.36525	3.5243	2.53877	2.4723	1.32117	1.41493
ANKRD33B	2.82869	2.89494	3.10851	3.09351	2.3225	2.21302	1.06233	0.97201
PLEKHG4	3.67939	3.74159	3.9671	3.90879	3.0467	2.99357	2.34341	2.40476
GNG2	2.66431	2.56146	2.65716	2.35826	1.98456	2.02435	1.04236	0.825092
HOXA7	2.53383	2.31133	2.56697	2.29948	1.40341	1.62297	0.403714	0.0904058
HOXB3	3.40873	3.31945	2.69472	2.85607	1.52561	1.53862	0	0
HOXD9	2.41576	2.41658	1.99298	2.32418	1.24096	1.57019	0.572467	0.431223
AP1S2	4.79632	4.76574	5.43328	5.38946	3.73255	3.90926	3.66235	3.57987
PRSS12	4.41638	4.44217	4.82339	4.93902	3.49201	3.50689	3.28536	3.38287
GRK5	3.61497	3.62168	4.14242	4.20382	2.97509	3.05677	2.52829	2.74856
EPHB6	1.53922	1.65459	2.13698	2.06303	1.14912	0.679268	0.548636	0.469143
HOXB4	1.76704	1.33291	2.07275	1.8257	0.808901	0.699658	0	0
PKD1L2	1.44202	0.948371	1.96625	1.66269	0.843761	0.770639	0	0.236391
TNFRSF10C	1.51738	1.40094	2.60085	3.00514	1.66741	1.39923	0.916062	0.838394
SFRP1	3.84527	3.84076	5.88521	5.92312	3.18821	3.21264	1.15966	1.4047
HOTAIRM1	1.74134	1.55152	2.59955	2.4784	1.67123	1.06223	0.354707	0.188467
ZNF385D	1.75464	1.9561	2.86948	2.68006	1.68237	1.83022	1.20749	0.789446
ATP5MF-PTCD1	1.78649	0.784945	1.35726	1.87533	0.00584606	0.240024	0.00638215	0.00683819
ENPP2	7.55975	7.57692	7.09024	7.12833	4.99699	5.09505	5.44026	5.43624
CH25H	3.9897	4.08593	3.47257	3.33354	0.370688	0.663256	1.31903	0.846724
C3	1.90507	1.93268	1.37082	1.49238	0.0972458	0.127778	0.439167	0.307472
DIPK1A	5.07324	5.05212	4.95719	4.91533	3.70638	3.83291	3.93531	3.8749
PPP1R12B	2.41297	2.3736	2.20777	2.19908	0.853182	0.960476	0.989034	1.08064
ZFPM2	1.79115	1.76914	1.61194	1.61424	0	0	0.31737	0.285716
TGFBR3	4.60215	4.59161	4.3693	4.45705	2.56165	2.67955	2.89894	2.90561
ADA	4.49336	4.39617	4.0492	4.35522	2.64743	2.53979	2.7871	2.5489
NKX2-6	3.20949	2.79584	2.27331	2.64178	0	0	0.222576	0
RAB11FIP2	3.70293	3.7191	3.39062	3.49881	2.17007	2.33676	2.3367	2.23794
MGST1	8.49265	8.45935	7.98668	8.02932	6.38196	6.3464	6.38307	6.3973
TBX1	3.82603	3.74975	3.07578	2.99612	0	0.165513	0.169354	0.169567
LURAP1L	4.81137	4.80276	4.39914	4.49985	3.1582	3.20439	3.11552	3.14824
HOXB-AS3	4.96408	4.98792	4.22829	3.77729	0	0	0	0
LAMA4	6.99981	6.97359	6.62445	6.6022	5.44291	5.39379	5.27869	5.32744
LGR4	3.63442	3.61389	3.36457	3.23258	2.2541	2.20078	2.36437	2.17894
MAP6	2.83133	3.09875	2.63844	2.61535	1.03257	0.741141	1.3585	1.36561
PLXNB1	3.36828	3.50279	3.04634	2.98779	1.82676	1.8341	2.19228	2.22018
TCF7L2	4.3484	4.42622	3.93164	3.83311	2.83973	2.76295	3.15252	3.13376
HOXB6	2.73546	2.59321	2.60046	2.36773	0	0	0	0
HOXB5	1.58662	1.71865	1.67434	1.64209	0	0	0	0
IGF2BP3	2.34863	2.31593	2.2993	2.3378	0.549338	0.459489	0.161227	0.34073
ADAMTS5	3.43656	3.60491	3.57557	3.51479	2.12629	1.92066	1.91849	1.85726
PPARG	2.61109	2.71011	3.01458	2.88235	0	0.359251	0.272471	0.284008
HOXB7	3.88218	3.59261	3.87548	4.03532	0	0.372778	0	0
HOXB8	1.51503	1.62007	1.8647	2.03638	0	0	0	0
NLGN1	2.2344	2.37746	2.46785	2.46391	0.445991	0.392565	0.529716	0.454394
CLU	4.05976	4.2869	4.53991	4.61279	1.75382	1.5757	1.81122	1.69968
TACSTD2	1.772	1.84915	2.04959	2.02919	0.452156	0.574211	0.460122	0.756718
PGF	2.32521	2.60184	3.03345	3.06178	0.188283	0.273007	0.0991322	0.583705
APOC1	0.92951	1.2375	1.54153	1.28492	0	0	0	0
TENT5B	2.39628	2.22672	2.09277	1.80044	1.00236	1.10913	1.05506	0.811876
MAN1C1	3.36876	3.27568	3.0426	2.87163	1.37894	1.65997	1.12844	0.92374
HOXD4	2.67939	2.47536	2.08639	2.01081	1.10768	0.702691	0.716297	0.515231
GASK1B	4.82816	4.94776	4.45197	4.45173	3.59942	3.44902	3.28692	3.42543
PBX1	3.99602	3.94285	3.30529	3.43895	2.61519	2.63147	2.1593	2.26958
REV3L	4.6949	4.75406	3.93324	3.96225	2.67243	2.69901	2.3199	2.37076
EMX2	5.12158	5.1277	4.38696	4.30683	2.34645	2.47859	1.49787	1.60607
EMX2OS	4.31467	4.31327	3.3766	3.49483	1.45817	1.58432	0.8017	0.920669
COL3A1	10.4048	10.397	9.87834	9.87525	8.77425	8.79172	8.38275	8.39071
IGSF10	1.26595	1.52155	0.992301	1.4256	0.132006	0.187441	0.0665928	0.0668301
TNFSF9	2.37783	2.54462	2.22676	2.59244	1.17329	1.21941	1.08472	0.714943
CXCL1	1.21387	1.35649	1.09788	1.47417	0.307574	0.161336	0	0
MCAM	2.42297	2.60141	2.60331	2.61541	1.67693	1.29822	1.00663	0.952873
LDLR	4.63412	4.58342	4.38137	4.52487	3.67426	3.58606	3.24176	3.11268
CASP1	2.94696	3.23482	2.97657	2.94183	1.95566	1.93851	1.74064	1.56283
ANGPTL2	6.0763	6.08608	4.70986	4.78909	4.44282	4.3846	5.0924	5.13911
C1R	8.34319	8.31398	6.02228	6.07478	5.40413	5.36413	6.55739	6.60466
IGFBP5	8.91496	8.91242	5.54581	5.57516	4.53518	4.58538	6.58912	6.58086
MUC1	4.72906	4.64955	3.05321	2.93505	2.47318	2.20885	3.5402	3.75231
C1S	8.55096	8.53518	6.69301	6.7438	6.52896	6.50029	7.47	7.50634
ADAMTSL4	5.65051	5.62259	4.04076	4.0395	3.84362	3.78425	4.67874	4.76119
PRKY	1.99424	2.03039	0.024907	0	0.0233709	0	0.963509	0.964464
C1orf115	2.19955	2.25192	0.122034	0.179786	0.0585107	0.11431	0.850077	0.816714
SIX2	2.41431	2.6101	0.170339	0.394019	0	0	0.831613	1.05729
ISG20	2.11678	2.56128	1.16624	0.838398	0.613537	0.758009	1.45998	1.34012
SNHG5	7.01155	6.97785	5.73417	5.8934	5.16726	4.98353	6.27319	6.15457
SLC39A8	2.41662	2.56135	1.13244	1.5937	0.781989	0.692084	1.59385	1.74956
IL20RB	4.38172	4.32505	2.132	2.53298	0.52155	0.695736	2.28485	2.4295
COL4A5	3.2329	3.32649	1.13809	1.2965	0.0259704	0	1.38578	1.35593
EPB41L3	4.30492	4.40588	1.86208	1.96558	0	0	1.95021	1.83058
DPT	7.46936	7.48819	2.6537	2.61931	0.293515	0.292479	3.56346	3.38595
RSPO3	2.20717	2.0965	0.832672	0.900495	0.108992	0.17668	1.12078	1.104
SNX9	6.46181	6.42576	5.21806	5.17548	4.66426	4.63958	5.27854	5.3631
ARRDC4	4.1411	4.14938	2.59155	2.63177	1.8279	1.87121	2.65447	2.80117
LMCD1	7.84113	7.84234	6.20268	6.18164	5.42101	5.54588	6.41276	6.40283
BEX4	4.25914	4.24371	3.10792	2.76681	2.585	2.94014	3.59492	3.56449
CLDN23	1.70057	1.73036	0.505333	0.275272	0.177757	0.334827	1.26612	1.34542
ACTA2	9.58375	9.59908	6.37739	6.28771	6.30296	6.36094	8.38758	8.37838
CEBPD	7.05175	7.10819	5.75223	5.60412	5.59757	5.61471	6.48779	6.41222
FOXQ1	2.09814	1.62283	0.42934	0.231087	0.282988	0.344639	1.1838	1.14932
PLPP3	7.32243	7.23444	6.17534	6.14613	5.87768	5.80447	5.48687	5.45072
BVES	3.64307	3.6234	2.42377	2.32913	2.19184	2.20795	1.72178	1.58151
MN1	3.78507	3.79258	2.36534	2.46699	2.33638	2.35829	1.64637	1.83317
MFAP4	6.93288	6.9618	5.70446	5.66947	5.48812	5.56419	5.13938	5.21202
LRRN4CL	5.03433	4.89857	3.76794	3.76566	3.32175	3.62764	3.28421	3.15668
HNMT	2.95354	3.08261	2.09943	2.38032	2.01957	2.24753	0.887666	1.47428
EGR1	6.99347	6.91742	5.64977	5.60318	5.97841	5.96838	4.1817	4.19932
DDIT4L	3.05835	2.92996	1.95075	1.85622	1.70631	2.05199	0.519128	0.701703
BDKRB2	4.29222	4.20979	2.83764	2.92454	2.81238	2.77779	1.35148	1.38542
OLFML3	7.54105	7.50572	6.47189	6.48724	6.24121	6.23787	5.3094	5.22514
LRIG3	3.83621	3.79955	2.85886	2.96368	2.72269	2.84878	2.1423	2.04069
LAYN	6.66688	6.65831	5.43645	5.31112	5.52609	5.5146	4.72595	4.69746
NTN1	1.88541	1.75467	0.0600198	0	0.285834	0.261131	0.166043	0.112938
SLC1A3	3.29747	3.25328	1.37528	1.22791	1.38239	1.45018	0.937771	1.22254
C1QTNF3	1.92536	1.59389	0.418291	0.0695292	0.224842	0.224464	0.350328	0.311295
ELANE	1.77107	2.13115	0.226411	0.42293	0	0.397771	0.573286	0.406771
DCN	11.0124	11.0015	9.16436	9.18443	8.76694	8.76843	9.43671	9.44491
LARGE1	3.90442	3.8873	2.41866	2.38218	2.10109	2.13537	2.50596	2.59947
ATP1B1	5.38746	5.34793	3.51182	3.27082	2.97989	2.86602	3.42308	3.45604
ZNF503	5.24834	5.34296	3.52293	3.55033	3.50523	3.3586	3.87085	3.78538
C1QTNF6	3.70657	3.69006	1.85632	1.88965	1.82045	2.0262	2.17297	2.26278
SLC7A7	2.6685	2.32519	0.856001	0.962019	0.553336	0.527841	0.778754	0.842561
CDON	2.94071	2.84715	1.20661	1.31192	0.962867	0.981537	1.19948	1.26472
AKR1C1	5.18825	5.09252	3.38788	3.33243	2.91407	2.83251	3.27255	2.92244
HOXB9	2.43356	2.43438	0.425055	0.477675	0	0	0	0
IGF1	2.0312	2.03909	0.188478	0.188897	0.0234006	0.02331	0.0238784	0.0474447
TNC	7.88007	7.89609	5.42257	5.47496	4.9848	4.94983	5.17489	5.16507
AKR1C2	2.75323	3.08872	1.95017	2.13091	1.41389	1.66333	1.28431	1.79061
OLFML1	2.53591	2.57878	1.41939	1.18293	0.67291	1.18174	1.17399	0.934334
LINC01936	1.41307	1.85406	0.323015	0.811149	0	0	0	0
BAALC	3.87094	4.12902	2.69773	2.97152	2.43782	2.53339	2.61543	2.38212
LINC00312	2.59541	2.45585	1.21441	1.29896	0.82264	1.01496	0.763237	1.15181
ANGPTL1	2.15717	1.90135	0.990495	1.04438	0.461592	0.563669	0.575091	1.01142
NREP	8.70854	8.7078	7.71905	7.60822	6.95665	7.02018	7.01224	6.92367
SIM2	4.50204	4.43087	1.82196	1.85928	0.112456	0.182163	0.382238	0.11483
PCBP3	3.4832	3.53176	1.8759	1.76336	0.770816	0.738766	1.0199	0.811247
CXCL12	9.2237	9.21023	7.49972	7.44141	6.61297	6.58111	6.75183	6.64383
ISL2	1.55231	1.85798	0.523548	0.524587	0	0	0	0
OSR2	5.99265	5.92907	3.98959	4.07831	2.89556	2.89019	3.33793	3.3711
SOD2	6.83126	6.62801	5.26567	5.1141	4.43247	4.54606	4.79147	4.74904
POPDC3	4.85817	4.88126	3.60708	3.34389	2.97304	2.85495	2.95694	3.18299
CD74	2.92142	2.95591	0.816393	0.562424	0.23685	0	0	0
PAX3	2.4721	2.65186	0.752398	0.513714	0.0877208	0	0.0603869	0
GEM	4.94883	4.95449	2.94485	3.25952	2.51801	2.34324	2.78645	3.09924
KCNK2	6.67034	6.63043	5.37945	5.40149	4.56151	4.63104	5.18997	5.07548
PDGFD	3.48418	3.52219	1.61503	1.82895	0.541604	0.478501	1.46839	1.44902
ECM2	4.31476	4.33342	2.07949	2.38591	1.29171	1.23895	2.12713	1.96646
MAFB	2.09215	2.33005	1.20312	1.18082	0.364447	0.515411	0.882248	0.666668
SRPX	6.77179	6.78271	5.05667	5.09538	3.60057	3.53444	4.42069	4.50162
IL1R1	6.10489	6.07457	4.93363	4.97856	3.83645	3.88948	4.25949	4.25712
SECTM1	4.51584	4.42252	3.32138	3.2549	2.10722	2.62369	2.03397	1.95385
NFKBIZ	2.54507	2.48015	1.53895	1.58109	0.848781	1.25079	1.03026	1.11357
RARRES3	2.67155	2.41719	1.45714	1.56973	0	0.688422	0.701813	0.504129
VIT	4.39223	4.31514	2.98847	3.19714	0.905558	1.13103	1.64723	0.96376
HOXD3	2.12701	1.65759	1.26286	1.26485	0.0768265	0.149213	0.223377	0.15289
LINC02381	4.77777	4.65614	3.86283	4.09171	3.15273	3.32383	3.19441	3.43796
MAN1A1	4.56562	4.43355	3.82717	3.92259	2.82854	2.70833	2.78447	3.04137
CAVIN2	4.17374	4.21658	3.5494	3.68919	2.64743	2.70204	2.72338	2.80657
ADH1B	3.68941	3.67115	1.77541	1.77052	0	0	0	0
MSTN	1.95416	2.06583	0.880426	0.918187	0	0	0	0.0631931
LBH	7.67849	7.67682	6.4238	6.49394	5.0061	4.88922	5.12222	5.04024
ALDH1B1	5.35865	5.36105	4.59873	4.53712	3.6862	3.66297	3.68157	3.85204
LOC100630923	1.27273	2.07813	2.09525	1.4323	1.08131	0.000194207	0.87053	1.51968
RPL21	5.09581	6.05369	5.1611	6.14384	5.05902	0.0453246	0.0451048	5.08646
RPS10-NUDT3	0	0.991992	1.5592	1.72994	0	1.92365	0	0.4554
ABHD14A-ACY1	2.28306	2.39862	2.46868	2.90749	0.036664	2.25681	1.90783	2.41409
H3F3A	2.85393	0.00387057	2.96168	2.93581	2.85931	0.00387374	2.86427	2.89008
NEDD8-MDP1	0	0.0031688	1.61036	1.82273	1.75852	0.00596617	0	1.46216
BCYRN1	9.06381	8.76061	10.3218	10.3069	8.87549	8.85427	9.48357	9.52642
PTGER2	1.11764	0.732681	2.58416	2.46567	0.636229	0.680135	1.40358	1.34757
GALNT3	0.105027	0.105098	2.02534	1.87907	0	0	0.581334	0.722292
TFPI2	2.43169	2.58796	6.53949	6.59788	2.02473	2.35818	4.31718	4.46515
USP53	3.43612	3.42978	5.50251	5.51433	3.4165	3.35461	4.50527	4.50016
SH2D4A	3.75021	3.78811	5.48005	5.44039	3.77407	3.7628	4.56792	4.4926
FIBCD1	0.308061	0.308257	2.50184	2.57453	0.210637	0.304374	1.10404	1.2665
TRH	0	0	2.16321	1.82491	0	0.0945199	0.927413	0.761015
IFI30	4.3989	4.3004	5.72665	5.72999	4.20172	4.19639	5.21283	5.03234
NEO1	2.24689	2.19015	3.36778	3.45084	1.78274	1.89309	2.88304	2.78182
LXN	0.172424	0.917833	3.75176	3.79736	0.323671	0.808664	2.58626	2.16028
FCRLA	0.215557	0.463184	1.65558	1.69191	0.180293	0.364444	1.13201	1.2104
DOK5	2.10038	2.28684	3.92896	3.87351	1.88611	1.96758	3.10022	3.25368
IL13RA2	0.672686	0.993319	2.90376	2.92674	1.18585	1.35787	2.56183	2.32457
NEFM	0.0704874	0.0534375	2.81328	2.65767	0.865341	0.759392	1.99042	1.76765
SGIP1	0.225706	0.173594	1.79156	1.7699	0.536516	0.569443	1.16036	1.40829
ABAT	0.679855	0.809831	2.3221	2.42097	1.22757	1.32754	1.47252	1.59999
PODXL	1.60133	1.71367	3.81845	3.78266	2.33359	2.32966	2.79137	2.79131
SVIL	1.20128	1.29688	3.45237	3.30946	1.65782	1.58862	2.42165	2.50213
MLLT11	1.61922	1.8268	3.30447	3.28915	2.13797	1.9495	2.57718	2.50457
CTSC	4.34339	4.64589	6.79148	6.79789	4.93437	4.98626	5.775	5.69826
CLEC14A	0.760376	0.341513	4.52994	4.57827	0.14503	0	4.27413	4.1889
TRHDE	0.357348	0.333001	1.91199	1.96613	0	0	1.90005	1.90991
SCN9A	0.354189	0.284429	1.99651	1.9473	0.337613	0.441631	1.74348	1.70747
EGFLAM	0	0.078025	2.36868	2.38774	0.286932	0.150029	2.10873	2.07364
GPR37	0.132347	0	1.46414	1.5013	0	0	1.07094	1.21986
SERPINB2	0.859766	0.913232	3.31849	3.21207	0.182073	0.1814	2.48515	2.4142
PRKG2	0.602756	0.676602	2.31861	2.29536	0.171704	0.218946	1.94436	1.89671
KRT18	2.20591	2.48148	5.87936	5.81373	0.730656	1.15045	5.29462	5.23778
ID1	3.72267	3.76083	5.32545	5.33682	3.72391	4.01034	5.31245	5.52705
CSF2RB	0.070142	0	2.45232	2.50288	0.346454	0.623628	2.79038	2.89835
SRGN	3.10547	3.47889	5.88238	6.02672	2.69159	3.01269	6.451	6.47482
FOXC2	1.63932	1.87399	2.6544	2.83549	1.43684	1.69676	2.96555	2.86103
EFHD1	0.221736	0.1152	1.89507	2.14692	0	0	2.63336	2.44748
PDE5A	1.83427	1.73235	3.43917	3.43062	1.64496	1.51939	3.71469	3.77262
PRR15	1.27083	1.48891	2.61843	2.75163	1.35345	1.11228	2.58491	2.86356
RDH5	1.88058	2.42659	3.26833	3.18775	1.8414	0.677408	2.80525	2.63915
HES1	2.6002	2.14041	3.19672	2.93139	1.35073	1.49411	2.3492	2.80014
SELPLG	1.63574	1.38875	2.34759	2.43583	0.61733	0.703711	1.57626	1.7577
SESN3	0.70698	0.644801	1.79015	1.70764	0.0876425	0.120814	1.22714	1.2686
CDH6	1.30142	1.29392	2.45439	2.50259	0.667745	0.615184	1.63665	1.74421
FHL2	6.99176	6.93185	8.06317	8.0554	6.36083	6.31574	7.39648	7.37474
PTGS2	1.01757	0.743727	2.12445	2.19161	0.0750729	0.0378784	1.27343	1.50013
PPAN-P2RY11	0.000829675	0.967325	1.16628	1.79737	0.00148485	0	0.445667	0.597968
PLAC9P1	0	1.12603	2.24631	1.80833	0	0	1.76104	0.67642
CKB	4.41924	4.55667	5.27155	5.14544	3.44272	3.63027	5.20271	5.16759
ADAMTS1	5.71884	5.73542	6.3277	6.37528	4.80706	4.7923	6.4691	6.4333
PTK2B	1.77906	1.71383	2.39381	2.45134	1.02492	1.09054	2.45966	2.64443
ITGA7	2.09698	2.08872	4.36624	4.35552	0.196656	0.411675	4.25883	4.27122
RELN	1.43807	1.3663	2.97409	2.94715	0	0	2.8069	2.85246
STEAP1B	2.09728	2.20115	3.17697	3.3793	1.23993	1.17171	3.27216	3.38153
TSPAN2	0.989703	0.740534	1.44072	1.6019	0.0553649	0	1.51892	1.3762
PALM	1.49538	1.60287	2.74832	2.99484	0.396153	0.394801	2.41567	2.36906
NGF	4.25462	4.35561	4.88334	4.7533	3.03464	2.82469	4.85721	5.08227
NTN4	4.42477	4.43482	4.82029	4.8739	1.88235	1.60439	6.19076	6.12052
GREM2	4.07373	4.03171	4.25403	4.26652	2.91911	2.94678	5.0196	5.00706
UCHL1	7.73333	7.75552	8.29967	8.2988	6.07295	6.01017	8.86854	8.86183
RHOJ	1.8098	1.72437	2.3237	2.35704	0.223702	0.0474188	2.9078	2.9095
ID3	5.42428	5.43277	5.66154	5.66824	4.39595	4.44276	6.02732	5.96009
PCOLCE2	2.84977	2.74546	4.05826	3.84284	0.248872	0.321995	6.16544	6.07979
SCUBE3	2.74352	2.7741	4.15784	4.15996	0.842733	0.764581	5.5017	5.47145
PI16	3.01272	3.27468	4.60013	4.89317	0.314616	0.241285	6.38489	6.29827
TMEM59L	1.71797	1.68236	2.00834	2.36623	0.490606	0.403556	3.07736	2.67381
HRCT1	1.51755	1.73571	2.15177	1.64933	0.547328	0.820454	2.47295	2.51478
BAIAP2L2	1.6804	1.31674	2.19795	2.43752	1.64403	1.26987	2.80014	3.07403
CGREF1	0.911911	1.28732	2.00672	1.54456	0.55071	1.02287	2.69613	2.3019
JUP	1.27682	1.38763	2.57415	2.48177	0.817532	1.24258	3.67039	3.74085
PDE1C	2.38437	2.67901	3.3665	3.55169	1.87536	2.06699	4.01757	3.95053
LAMA5	0.618686	0.518841	1.09167	1.26691	0.113175	0.152858	1.69058	1.77778
GGT5	1.36864	1.24675	2.53923	2.36966	0.209971	0.554036	3.20423	3.45768
ANKRD1	2.27987	2.33779	4.06531	3.94431	1.19845	0.976298	6.11532	5.99086
TMEM110-MUSTN1	0.982782	0.985238	1.54162	1.41595	1.03838	0	2.17675	1.94749
GDF5	2.51945	2.70027	4.02566	3.87876	1.60791	1.26055	2.1588	2.32796
OLR1	0.759006	0.512321	1.86482	1.73599	0	0	0.281378	0.404287
GPAT2	0.770888	0.654699	2.2132	2.64033	0.0617479	0	0.885934	0.778244
PENK	2.19865	1.98822	6.50473	6.54082	0.426915	0	2.01674	1.93114
PLCB1	0.627465	0.572736	1.98867	1.89542	0	0	0.862255	0.767267
PALMD	0.57262	0.945886	2.31112	2.48312	0.254661	0.253748	1.05911	1.0256
GABBR2	1.48619	1.55964	1.97482	2.1512	0.219209	0.339837	1.00348	0.878526
AKAP12	4.10554	4.1441	4.84682	4.83775	3.15012	3.17143	3.74988	3.74459
KRT8	1.65936	1.55415	2.4217	2.38751	0.517855	0.516158	1.38709	1.34731
PSG1	3.04858	3.08004	5.18551	5.19713	1.19825	0.78166	0.945406	0.872454
LSAMP	1.01596	0.934098	1.592	1.62548	0.017707	0	0.105168	0.0710512
PRPS1	5.42884	5.43972	6.27367	6.28403	4.44115	4.35974	4.77093	4.73106
BMP6	1.26023	1.41985	2.07052	2.30026	0.352128	0.0556648	0.787119	0.489123
S100A3	3.36924	3.1407	4.35669	4.25965	2.72035	2.61828	2.48754	2.59787
G0S2	1.57708	1.04885	3.93965	3.89664	0.539491	0.379762	0.387945	0.549345
PSG2	0.655612	0.86585	2.31994	2.67689	0.112914	0.314149	0.221779	0.222059
LAMB3	1.83382	2.06052	3.44329	3.44477	1.09219	1.09184	1.26511	1.35516
CARD16	1.723	0.877655	2.87577	2.20397	1.16572	1.2898	0.708839	1.09275
LCE2A	0.377439	0	2.05609	2.44161	0	0	0.682242	0.381535
TNFRSF25	0.585829	0.239429	1.87539	2.17128	0.611605	0.341424	1.03355	0.686776
SNCG	1.42034	1.083	3.65634	3.68182	1.07529	2.38611	1.21303	1.21414
SCIN	0.573623	0.371505	3.56643	3.35654	1.14442	1.39538	0.725697	0.842121
SCARA3	2.07241	2.07315	4.22889	4.15127	2.01504	2.15837	1.70531	1.66658
CECR1	0.411154	0.37516	2.28278	1.97551	0.60657	0.7789	0.0931162	0.0932387
PDE7B	0.885769	0.903555	3.43017	3.35217	1.07379	1.29446	0.345564	0.560009
METTL7B	0.341246	0	1.78359	2.00492	0	0.43411	0.535686	0.124392
IL18	0	0	1.55835	1.79482	0	0.316501	0.170712	0.170898
WNK4	1.75962	1.92427	3.29137	3.32581	2.0503	1.97404	1.89004	2.1041
DNASE1L3	0	0	2.41897	1.98269	0	0	0	0
COL23A1	0	0	2.37501	2.32941	0.111224	0.262528	0	0
MMP10	0.103541	0	3.1975	3.08475	0.452632	0.287186	0.202196	0.104774
RASGRP1	0.102384	0.132258	1.58565	1.68227	0.13098	0.178442	0.112282	0.112429
PLEKHG5	0.682685	0.784403	2.72029	2.7065	0.768808	0.782008	0.774738	0.81936
DEFB109A	0	0	2.71965	2.72254	0	0	0	0
SPP1	0.439991	0.324108	3.23655	3.28799	0.613413	0.499752	0.764207	0.345672
LOC728392	2.50297	2.65551	5.32786	5.32436	2.37293	2.532	2.96483	2.93259
BEX1	1.26813	0.612171	7.07371	7.11057	0	0.430232	1.04822	0.919288
KRT19	1.86744	1.90386	7.23309	7.20279	8.74382	8.7321	8.9305	8.906
TNFRSF21	1.89709	1.8582	3.55212	3.45574	3.86738	3.72764	3.59528	3.73259
RRM2	1.06716	0.501569	2.70149	2.6132	3.42829	3.39789	2.99087	3.1186
MT1L	1.85614	2.05195	4.26809	3.83965	5.26222	5.43974	4.20822	4.50795
IQGAP3	0.307149	0.481001	1.47256	1.53851	2.08121	2.1984	1.62238	1.69679
ASF1B	0.874601	1.09585	2.15106	2.1537	3.01	2.81888	2.48447	2.44602
ARHGAP18	2.63913	2.79404	4.20931	4.18627	5.27769	5.20471	4.43399	4.3505
CDA	1.34141	1.65494	3.86893	3.78979	5.46452	5.50301	4.5914	4.26073
NUF2	0.709561	0.646267	1.79153	2.03167	2.30007	2.25494	2.0503	1.88373
OXTR	3.65246	3.66293	6.23281	6.23731	7.10576	7.08273	6.4226	6.39103
CDK1	1.46972	1.60631	2.7067	2.78634	3.23153	3.19716	2.78567	2.81312
ITGB2	0.377335	0.507731	1.68279	1.70885	2.15514	2.37075	1.99107	1.92966
CD36	0.66515	0.832855	3.34827	3.63008	4.43027	4.43695	3.99003	3.94456
SSC5D	2.96342	2.98564	4.24686	4.15413	4.94151	4.94586	4.62106	4.62026
SDC1	3.09552	3.08221	4.74018	4.78974	5.62989	5.68273	5.22716	5.29899
UACA	3.23236	3.28586	4.7798	4.83719	5.47214	5.4896	5.1943	5.21144
CDCA8	0.755485	0.774123	1.64379	2.11506	2.31743	2.66712	2.11506	2.18142
CTSH	0.124779	0.239774	1.71815	1.28376	1.77241	2.35064	1.40271	1.71651
TTC12	0.524436	0.468681	1.38991	1.32678	2.17895	1.86765	2.03642	1.50111
UBE2C	2.64452	1.73686	3.6883	3.24349	4.44492	4.61856	3.68718	3.90068
CDKN3	2.22881	2.23729	3.47804	3.25839	3.92721	4.21139	3.06962	2.83697
FAM86DP	2.2072	2.23906	3.56402	3.3585	3.62043	3.84665	2.77438	2.78673
TK1	2.67971	2.80608	4.85072	4.87149	4.96926	4.89383	4.16901	4.2042
DNAJB4	4.18459	4.12092	6.27293	6.20033	6.33852	6.29322	5.44521	5.3114
KIF20A	0.711209	0.742478	2.95747	2.82965	2.91786	3.0348	1.93628	2.12716
ANLN	1.65414	1.73521	3.58204	3.58649	3.83803	3.9877	2.93097	2.96283
PTTG1	2.42196	2.56925	4.61518	4.63042	4.94246	4.86971	3.89901	3.88061
MMP1	2.33496	2.38569	6.53745	6.62644	8.14316	8.13106	5.1318	5.04449
CEP55	1.32244	1.17096	2.87561	3.05931	3.43434	3.37362	2.2909	2.21917
CPA4	3.11396	3.06511	4.409	4.34731	4.59402	4.59384	3.82337	3.74067
CCNB2	1.80533	1.35036	3.14004	3.12811	3.17175	3.35805	2.67646	2.37317
NEK2	0.466339	0.520752	1.54252	1.76084	2.25497	2.15452	1.39138	1.44519
CENPA	0.647872	0.489803	1.58296	1.9587	2.27412	2.05988	1.3381	1.5211
NUSAP1	1.27295	1.47048	2.88908	2.72173	3.41588	3.51874	2.18534	2.5966
CDCA3	0.681635	0.942465	1.983	1.97491	2.33301	2.47193	1.59032	1.84265
PIMREG	1.1706	0.988161	2.42718	2.00992	2.82248	2.81765	2.01996	2.05217
TRIM14	1.1074	0.859186	2.14947	2.10631	2.91149	2.66887	1.71427	1.95188
LMNB1	1.27094	1.12971	2.55892	2.40787	2.95818	3.1291	2.03064	2.18479
PHLDA1	2.64284	2.52678	4.23256	4.26505	5.20837	5.20288	3.70028	3.64413
PBK	1.25753	0.931849	2.71484	2.52306	3.03472	3.02863	2.28288	2.45053
GTSE1	0.812002	0.601586	1.99371	1.93403	2.33852	2.27673	1.6832	1.70251
PRC1	2.24245	1.93755	3.42236	3.48231	3.82029	3.87492	3.11704	3.20168
DLGAP5	0.734209	0.660797	2.48521	2.27297	2.62027	2.70115	1.87346	2.04256
BIRC5	1.61062	1.14003	3.31455	3.25581	3.5119	3.48326	2.88909	2.81103
IFI27	4.75885	4.53546	6.86843	6.86608	7.22352	7.18682	6.59646	6.55444
APLP1	1.77539	1.95974	3.4475	3.33831	3.50683	3.73403	3.15608	3.29529
TPX2	1.96699	2.02817	3.459	3.49419	3.77484	3.84112	3.32584	3.40803
FAM83D	0.603948	0.832163	2.15686	1.96983	2.46775	2.42229	1.83807	1.90177
KIF2C	0.597231	0.824322	2.25586	1.88774	2.66547	2.6065	2.008	2.10509
BUB1	0.811087	0.681043	1.86576	1.88304	2.30585	2.44155	1.85493	1.83612
SPAG5	0.797434	0.715627	1.95638	1.90758	2.35058	2.42472	1.80646	1.88602
ZWINT	1.83218	1.6901	2.91357	3.07338	3.34029	3.51712	2.87114	3.03501
NCAPG	0.61723	0.617592	1.89236	1.84166	2.28376	2.21341	1.79715	1.71843
PLK1	1.34704	1.53023	2.86423	2.95989	3.41766	3.4353	2.87951	2.70029
CDC20	1.40762	1.74978	3.36624	3.54441	4.03902	4.18307	3.09759	3.1259
TOP2A	1.50268	1.60573	3.16824	3.08388	3.85792	3.87104	2.84245	2.95032
CCNB1	2.27217	2.35841	3.78245	3.77251	4.26841	4.35202	3.50672	3.63858
CAV1	8.03716	8.07291	9.21013	9.24765	9.67589	9.66293	9.04731	9.03179
AURKA	1.64236	1.06412	3.1405	3.09749	3.05096	2.91024	2.4527	2.6596
KRTAP1-1	0.412974	0	3.68958	3.65304	3.09611	3.27296	2.97615	2.17727
STAMBPL1	1.59449	1.50465	3.32	3.32307	2.86904	3.02268	2.63179	2.43282
ENC1	1.48964	1.4248	3.15833	3.18563	2.80738	2.8769	2.49538	2.52512
DCBLD2	3.53146	3.41239	5.4605	5.50074	4.90309	4.87209	4.78339	4.7601
MMP3	3.23369	3.64956	7.01461	6.99515	6.19508	6.15007	5.72797	5.68408
FOSL1	4.48505	4.42439	6.18943	6.14544	5.51443	5.65437	5.22828	5.20539
GPRC5A	0.971794	0.972291	3.9318	3.90856	2.54787	2.64615	2.23591	2.36681
PNPLA4	0.584395	0.728461	3.23004	3.2414	2.10249	2.06204	1.83429	1.93933
C5orf30	2.85276	2.89422	5.35942	5.28091	4.33847	4.33311	4.39241	4.5124
RIN2	3.05694	2.95491	4.7311	4.6603	3.8706	3.83435	3.9555	4.0051
DUSP5	1.86309	1.95931	3.72782	3.83052	3.01785	2.67855	2.93393	3.05414
ELOVL6	1.53242	1.49652	3.27406	3.5598	2.63647	2.64959	2.88511	2.7413
GINS2	0.775413	0.963159	2.08999	2.46493	2.56922	2.38222	1.9553	2.23953
SPESP1	0.35948	0	2.39591	2.06348	2.32648	2.57958	1.91273	2.31769
PRSS3	0.843995	1.25839	3.5476	3.47267	3.43787	2.97535	3.03544	2.81323
PSD3	1.52258	1.57956	3.06171	3.00591	2.99921	2.89734	2.65705	2.71174
NCEH1	1.94386	1.88608	3.42848	3.50157	3.24677	3.42422	3.14366	3.04703
UBASH3B	0.843128	0.634772	2.63126	2.54659	2.35143	2.43131	2.29016	2.27619
APBB1IP	2.14499	2.23595	3.97848	3.7955	3.7375	3.82593	3.72854	3.76652
WNT5B	4.22065	4.36768	5.99598	6.00769	5.93521	5.93919	5.87836	5.76733
SHCBP1	0.967057	0.967553	2.43225	2.57868	2.68889	2.56054	2.29276	2.33911
MALL	1.59649	1.43371	4.38719	4.44823	4.54695	4.55633	4.1752	4.25653
STMN1	3.80773	3.9047	6.03885	6.09414	6.16276	6.23277	5.78288	5.84151
UBE2T	1.49035	1.86172	3.16903	3.02544	3.31676	3.50853	3.43484	3.16915
CENPM	0.985643	1.26526	2.41537	2.52642	2.62732	2.45919	2.56486	2.32206
PTGER3	0.780875	0.636677	2.42944	2.41409	1.67661	1.98554	2.28896	2.14901
PLPP4	1.89682	2.08862	3.23968	3.53675	3.03992	3.16616	3.21123	3.60977
SLC9A7	1.33275	1.3266	2.76699	2.79343	2.41314	2.56401	2.83132	2.8758
SPRY4	0.982867	1.13548	2.98819	3.0778	2.49199	2.5793	2.88107	2.88915
EPDR1	3.81203	3.96279	6.45516	6.50299	6.30649	6.29995	6.47181	6.48007
ITGA3	4.21891	4.23465	5.80482	5.80556	5.62439	5.57443	5.87257	5.90483
NME1-NME2	2.7675	0	3.81818	3.79021	3.86161	4.53314	3.57333	3.65708
CCN2	8.22335	8.2492	9.47431	9.47238	9.16459	9.14053	10.0167	10.0045
SFRP4	1.06073	1.06125	4.52173	4.51666	4.3625	4.3687	6.38972	6.42682
MYPN	0.196798	0.0686716	1.20919	1.45462	1.23165	0.953487	1.96685	1.7725
FUCA1	2.11302	1.9874	3.47146	3.17044	2.94657	3.27973	3.88915	3.8609
PPP1R14A	2.21425	2.69253	4.12507	3.76909	3.96578	3.8044	4.74214	4.71058
CCND1	6.44011	6.4458	8.18118	8.20245	8.51796	8.55625	9.03035	9.01635
TMEM200A	4.44866	4.48456	6.09018	6.06815	6.31098	6.31198	6.66985	6.72959
ETV5	2.06153	2.15176	3.21296	3.24018	3.20608	3.44934	3.733	3.71844
SCFD2	3.00866	2.98135	4.23025	4.26475	4.2224	4.15929	4.5289	4.57916
NES	0.496115	0.582229	2.8215	2.92778	2.84475	2.83128	3.44814	3.30742
TINAGL1	0.875628	1.18511	5.17456	5.07345	5.36379	5.36587	5.97575	5.99647
CRIP1	5.54854	5.01818	6.49417	6.5047	6.60919	6.44635	6.95979	7.01539
ADCY4	0.588739	0.554819	1.30958	1.71594	1.83214	1.81529	2.33001	2.10667
TMEM130	1.0398	1.04673	2.71541	2.75809	2.08063	1.98147	3.08057	3.08486
PRICKLE1	0.933298	0.958541	2.89781	3.03095	2.35976	2.24539	3.07864	3.17001
EXTL1	0.979114	0.71179	2.49789	2.18106	1.74208	1.35464	2.76541	2.5344
PGBD3	0.249995	1.15789	2.50556	2.374	1.83827	2.10118	2.56526	3.04723
PLSCR3	3.85535	4.30308	4.69918	5.31103	5.29162	4.87708	5.49872	5.71241
APOBEC3C	4.49958	4.57992	5.48486	5.5479	5.72335	5.73502	4.38667	3.95471
FLVCR1-DT	0	0.565036	1.73153	1.41231	1.73637	2.00276	0.787865	0.313246
SLIT2	3.30242	3.31792	4.29725	4.24046	5.32982	5.31011	3.34524	3.24955
ZIC1	0.157054	0.325613	2.02193	1.80076	3.31536	3.34937	0.0331644	0
APOBEC3B	0	0	1.64969	1.19283	1.80417	1.72736	0	0
ZNF880	0.882156	0.968066	1.92236	2.05454	2.25888	2.36728	0.889381	1.0963
ACP5	0.62922	0.348856	2.46565	2.46844	3.10318	3.0209	1.08639	0.635505
RARB	0	0	1.70088	1.437	2.49868	2.33669	0.781788	0.575738
QPRT	1.61223	1.72945	3.05897	3.10826	3.73468	3.66358	1.91574	2.01335
SH2B3	3.31755	3.34562	4.55218	4.47979	4.95435	4.98276	3.69949	3.84554
URGCP-MRPS24	0	0.921429	1.90728	1.61	1.13708	0.902256	0	0
CALHM6	0.742368	0.169727	2.06886	1.80352	1.38422	0.732268	0.422398	0.749517
RND3	6.79183	6.72217	8.09228	8.06838	8.17549	8.1039	7.19438	7.22826
FOXM1	2.18415	2.16265	3.85579	3.89445	3.81719	3.78498	2.71566	2.54087
GSTM4	2.32008	2.11011	3.65429	3.77081	3.62858	3.59789	2.63752	2.46726
NMT2	3.13673	3.16027	4.8465	4.88385	4.63294	4.64394	3.85342	3.84837
CDH4	0.732936	0.682384	2.20573	2.1816	2.09518	2.10467	1.35935	1.66883
PACSIN3	2.05269	1.70283	3.33479	3.46964	2.91885	2.82071	1.96345	1.96491
VAT1L	0.367544	0.4034	2.54487	2.4875	1.67969	1.63206	0.217809	0.134763
TTC32	1.21338	1.09167	2.42707	2.37543	1.99496	1.92163	0.965207	0.966162
CNTN3	2.75564	2.62004	3.99418	4.02738	3.43038	3.47293	2.475	2.41786
CASS4	0	0.115018	1.76935	1.79132	0.897368	1.25735	0.278772	0.280073
GSTO2	1.08364	1.20473	2.56522	2.63839	2.07415	2.2181	1.06326	1.29697
FOXL2	0.118043	0.227302	2.70898	2.42712	1.53622	1.42363	0.0608758	0.229747
KITLG	3.66897	3.68237	5.47412	5.38729	4.65938	4.68592	3.79141	3.90347
TNFRSF19	2.55396	2.64036	4.34055	4.29635	3.54703	3.69693	2.58371	2.66781
HAPLN1	1.73384	1.94299	5.52153	5.45729	3.105	3.10001	0.975839	1.08752
EGR3	0.700892	1.0224	2.15889	2.04942	1.88486	1.57277	0.649356	0.734818
ZIC4	0.23744	0.147189	1.34537	1.45482	1.27312	1.15294	0	0
MATN2	1.29368	1.34148	3.27153	3.1847	2.85785	2.92326	1.34221	1.40559
XIST	0.00871671	0	3.21859	3.22757	3.04157	3.04291	0	0
GSTT1	0	0	5.66855	5.66506	5.61707	5.52029	0	0
OCIAD2	2.87182	3.35569	4.68712	4.73282	4.63509	4.79013	3.09814	3.29993
DNASE1L1	3.64271	3.64342	4.74665	4.8318	4.58448	4.61265	3.10472	3.1538
TMEM25	1.37368	1.6531	3.26028	3.28345	2.71142	2.78489	1.89975	2.14009
NDRG4	1.33412	0.894303	2.85614	2.94193	1.82788	2.09473	1.67228	1.5916
WNT2	1.10817	1.34232	4.58847	4.64504	2.82458	2.71708	2.22599	2.17404
TMEM97	1.18405	1.12109	3.19623	3.0174	2.4097	2.36513	1.7756	1.52719
COTL1	6.1473	6.08277	7.73455	7.77353	6.98285	7.07058	6.46262	6.37999
BLOC1S1-RDH5	1.89695	0.000565939	1.06723	0	2.11153	2.01752	0.000636603	0.951527
P2RY11	1.32253	0.862133	1.33286	0	1.94284	1.98668	1.27559	0.835689
EDIL3	4.09358	4.04073	4.61961	4.66208	5.73938	5.69837	5.07398	4.99151
HAS2	3.27225	3.14381	3.93733	4.07289	6.10553	6.15141	4.7387	4.72819
NR2F1	2.72568	2.7408	3.46698	3.43806	5.80402	5.81019	4.64002	4.77045
PDGFC	4.19626	4.17639	4.70549	4.71945	6.49562	6.49428	5.47378	5.49691
CPXM2	4.48038	4.50452	4.88724	4.9599	6.40213	6.37136	5.57085	5.63299
PREX1	0.260422	0.194058	0.846268	0.651903	2.21235	2.15143	1.61096	1.40969
PRAG1	1.62142	1.35902	2.40762	2.49619	3.50297	3.72734	3.22442	3.13959
LYPD6	0.700251	0.532615	1.88875	2.11759	3.93793	3.92989	2.99632	2.95884
COL18A1	4.42229	4.53478	5.13636	5.0855	6.24477	6.26501	5.71378	5.72858
TMTC1	0.624526	0.711012	2.00145	1.98845	3.559	3.52735	2.60072	2.78563
CDCA7L	2.8709	3.0306	3.74451	3.59634	4.64371	4.66062	4.09818	4.14596
CCDC188	0	0.345452	0.362407	1.10096	2.54119	2.39734	1.79075	2.00384
STMN2	2.32499	2.01392	2.95941	2.77052	8.64003	8.62101	7.32663	7.29647
SERPINA9	0	0	0.225181	0.242518	1.90396	2.0245	1.65251	1.48077
LIMCH1	1.93093	1.70567	2.31202	2.36216	4.73882	4.72826	3.92688	3.88651
TBX2	1.55086	1.73643	2.11975	2.0966	3.23335	2.99465	2.95173	2.93964
UCN2	0.239619	0.346205	0.738085	0.968267	1.94998	1.69088	1.54497	1.75611
ST6GALNAC5	1.1391	1.29667	1.71052	1.82627	3.09134	3.06499	2.62818	2.55315
LAMA2	2.77845	2.79967	3.34905	3.31146	4.65614	4.6186	4.30644	4.27743
SFTA1P	0.306949	0.307143	0.808411	0.809876	1.74355	1.83728	1.65865	1.65999
SCG5	2.6685	2.59127	2.90036	3.21297	4.56312	4.62133	4.26523	4.61764
SAMD3	0.145131	0.7383	1.24829	1.56497	2.39984	2.29845	1.80062	2.06863
MT1M	1.57106	2.44318	2.50711	3.2247	4.01197	4.31936	3.90208	3.75193
MND1	0.700644	0.392668	0.49266	1.21384	1.87608	2.15126	1.45323	1.61213
MT2A	8.30128	8.27228	9.37038	9.43478	10.5549	10.6067	10.5425	10.49
COL7A1	1.74292	1.68114	2.97051	2.93537	4.3427	4.41942	4.27188	4.26299
FOXF1	0.198065	0.135108	1.06216	0.952211	1.96919	1.91031	1.66994	1.82073
PHLDA2	3.95971	3.96067	4.84204	4.79282	5.61219	5.73328	5.81871	5.65702
LFNG	2.16803	2.21462	2.87305	2.80966	3.50603	3.72255	3.77017	3.57575
IL7R	1.0372	1.48283	3.93322	3.95304	6.23261	6.25129	5.48954	5.44453
FAM43A	2.01006	2.13234	3.50368	3.42527	4.57218	4.61783	4.37288	4.2014
AURKB	0.884941	0.749663	2.17761	2.03377	3.09614	2.82996	2.57624	2.70371
RGS7	0	0.142045	0.773995	0.907602	1.81141	1.79611	2.53086	2.18889
KRTAP1-5	5.30268	5.30802	6.02868	6.04863	6.86424	6.79442	7.24214	7.13817
RIPOR2	1.05597	1.24816	2.32945	2.09798	3.42179	3.19602	3.92977	3.88542
NTM	1.50634	1.39256	2.65937	2.54642	4.73519	4.6899	5.03244	5.1724
SHROOM2	0.0453517	0.02287	0.743838	0.843633	2.12208	2.23343	2.39993	2.55623
FLT1	1.15168	1.19666	2.39979	2.69249	4.74936	4.76558	4.90852	4.93523
DKK 1	7.43881	7.44462	8.53848	8.53625	9.91341	9.90714	10.189	10.1525
NTNG1	0	0.0599387	1.22863	1.03144	1.63086	1.67081	2.21513	2.0915
LYPD6B	0.225342	1.01081	3.02549	2.69134	4.57137	4.64023	5.28642	5.1903
DUSP6	1.27118	1.15905	2.30539	2.39508	3.0758	3.16586	3.27008	3.31503
CD9	2.28042	2.28123	4.97771	5.0643	6.53489	6.52771	7.09572	7.10321
SLC20A1	4.13318	3.98925	4.89522	4.85108	5.51974	5.46221	5.74466	5.72561
CTSB	8.9023	8.92073	8.91932	8.93536	10.5655	10.5871	11.3573	11.3568
L1CAM	0.366242	0.445214	0.543919	0.532427	3.45336	3.54194	4.65417	4.731
MST1R	0.0372466	0.109069	0.11489	0.151582	1.12359	1.18533	1.81087	1.71359
HOTTIP	0	0	0.0389689	0.15027	1.64672	1.61905	2.39102	2.14122
TEX9	0.853268	0.600304	0.706145	0.816815	2.34854	2.42749	2.82203	2.91924
SIK1	0.925674	1.25634	1.27005	1.06246	2.26874	2.26427	3.07578	3.03692
FERMT3	0.881005	0.993494	0.83553	0.997162	1.80798	1.88252	2.61022	2.64692
SAMD5	0.0270023	0.0795906	0.0285064	0.0285733	1.84103	1.84448	3.22151	3.16293
IL27RA	0.8105	0.557256	0.431195	0.484455	1.63234	1.56194	2.23732	2.41692
BST2	2.50813	1.99491	1.82837	1.94795	4.52085	4.53304	6.16914	6.33428
SYPL2	1.57202	1.76359	1.2219	1.0676	2.9799	2.99821	4.46125	4.52189
STMN3	2.62015	2.58961	2.27001	1.90246	3.98556	3.99943	4.35747	4.54968
LAMA1	1.07927	0.97591	0.512288	0.28704	2.34564	2.32383	3.12563	3.07322
FRY	1.8417	1.838	1.58954	1.59738	3.0958	3.12172	3.6017	3.52753
SOCS2	2.26472	2.22997	2.32818	1.73579	3.49394	3.40434	4.09848	4.14604
SLC2A5	0.910898	0.552205	0.285415	0.410253	2.42214	2.07679	2.47355	2.89016
RASSF7	1.84355	1.68956	1.69918	1.36059	2.77464	2.31296	3.16241	3.25122
BMP4	0.105278	0.380924	0.310256	0.214528	3.86583	3.88418	4.52336	4.52778
CILP2	0.266181	0.300684	0.166455	0.243522	1.70717	1.58463	1.75289	2.05823
HOXA11	2.21308	2.24298	2.49555	2.08756	3.79832	3.97938	4.03759	4.06851
DCLK2	1.91729	1.8252	1.76184	1.80761	3.32609	3.26288	3.05835	3.1454
HOXA13	0.137695	0.137787	0.21247	0.39845	3.92938	3.8519	3.55859	3.51632
PCSK6	0.0398688	0	0	0	1.20474	1.3182	1.02213	1.34275
HOXB13	0.11327	0	0	0	2.18903	2.57446	2.19911	2.30088
CMKLR1	0.249199	0.190941	0.32071	0.262585	2.25276	2.39389	2.35816	2.43801
FAM89A	0.98823	0.922157	1.15576	1.02966	2.88333	2.86104	2.8192	3.01111
PITX1	0.277796	0	0.224306	0.419244	2.50594	2.55371	2.62108	2.42035
COL13A1	2.34258	2.43972	2.46352	2.58179	3.76804	4.10301	4.07143	4.15415
COL8A2	3.15888	3.1147	3.52159	3.56768	5.4361	5.40242	5.73143	5.82879
COBLL1	1.24227	1.25606	1.65915	1.73535	3.25026	3.28255	3.59097	3.59678
STXBP2	0.270474	0.350707	1.05936	0.957318	3.25392	3.52847	3.81539	3.87232
ADRA1D	0.687719	0.555941	1.3718	1.57996	3.71147	3.74169	4.24437	4.11774
GJA1	7.08082	7.05073	7.3159	7.2769	8.41519	8.39381	8.75018	8.7645
INPP4B	1.9432	1.89779	1.96707	2.20844	3.44173	3.40441	3.65525	3.64297
CPNE7	1.66926	1.57252	2.4441	2.23555	5.05318	4.97104	4.75001	4.7725
PTPRB	0.68961	0.800258	1.11623	1.14658	2.96014	3.00659	2.90231	2.98073
GRAMD2B	4.67811	4.52737	5.02808	4.93649	6.03613	6.06463	6.04103	6.1239
CHST15	1.99452	1.91106	2.31549	2.26875	3.47904	3.57963	3.67128	3.55302
AMIGO2	2.40477	2.58136	3.20533	3.45437	5.0714	5.07099	5.96404	5.99256
ENPP1	1.56014	1.53717	2.30197	2.3863	4.16186	4.17553	4.98272	5.03031
SYNGR2	2.63296	2.54054	3.12273	3.04182	3.83099	3.95254	4.33875	4.29512
PDE4B	1.3641	1.31051	1.64868	1.5198	2.45193	2.46209	2.9951	2.86686
SERTAD4	0.823379	1.15011	1.53438	1.31831	2.60455	2.72938	3.23699	3.22878
EREG	0.0735129	0	0.221135	0.413686	1.42383	1.24301	2.12298	2.11571
TFAP2A	0.436402	0.29251	0.98943	1.05688	2.13152	1.9951	3.08815	2.89626
LTBP2	6.13774	6.14694	6.44531	6.47603	7.16926	7.19387	7.76541	7.75702
CSTA	1.08124	1.8502	1.24797	0.988791	2.62254	2.8188	3.09097	3.0605
SORCS2	1.82786	2.2141	1.57707	1.53835	3.15879	3.01447	3.40503	3.36258
SEL1L3	3.62835	3.66446	3.3247	3.35284	4.71811	4.77454	4.68169	4.71783
AMZ1	0.797879	0.728545	0.482908	0.605135	1.71839	1.83263	1.84506	1.89275
IL7	0.765555	0.920429	0.357171	0.593163	1.65142	2.06485	1.94264	1.91049
CADM1	1.94356	1.98598	0.24164	0.242167	4.29025	4.24314	3.86702	3.66802
COL16A1	5.95407	5.89793	5.14444	5.11118	6.84238	6.8795	6.67046	6.67332
LPXN	4.99111	5.05604	4.35631	4.3042	6.66218	6.69979	6.20522	6.21218
FAM155A	1.68471	1.84649	0.553725	0.521534	3.7078	3.7198	3.07397	3.03681
EGR2	1.38205	1.5479	0.68948	0.812566	2.22598	2.48392	2.49571	2.35421
SGCG	1.72797	1.58258	0.224613	0.419783	3.41108	3.21134	3.67475	3.52292
MT1A	0	0	0.714044	1.19146	2.00105	2.19831	0	1.78873
PLEK2	0.634913	0.871725	1.11629	1.46257	2.18893	2.29556	0.355529	1.01868
TROAP	0.811859	1.17764	1.04163	2.29832	3.02378	2.49342	1.11274	1.46491
LY6E-DT	1.51719	2.01021	2.68022	2.62664	3.59321	3.02161	2.45196	2.32375
HGF	0.291066	0.779145	0.719126	1.09911	2.39651	2.32504	1.13752	0.981999
PTGER1	0.251197	0.561516	0.850859	0.852381	2.22462	1.6591	0.823035	0.90029
DUSP4	0.253514	0.304468	1.22047	1.10606	2.95721	3.07846	1.55687	1.40178
FHAD1	0	0	0.847922	0.808747	1.82996	1.85414	0.986186	0.80132
ITGA6	2.04471	2.00484	3.12781	3.14399	4.7141	4.77395	2.83244	2.89358
COL8A1	5.2904	5.25461	6.66225	6.72335	8.18558	8.15916	6.49381	6.52784
ARHGAP29	3.83883	3.94565	4.92158	4.98556	5.86595	5.89898	4.687	4.68448
LMO7	5.8276	5.82975	6.66495	6.67343	7.51555	7.52987	6.49456	6.44776
TNNC1	0.957955	0.557394	1.16638	0.998513	3.8618	3.8332	0.308273	0.562765
HPCAL1	4.16397	3.8841	4.06482	4.01398	5.42573	5.42411	4.00781	3.99098
KRBOX1	0.56182	0	0.32361	0.324297	2.8342	2.82935	0	0
ICAM4	0	0.149465	0.299194	0.157683	1.54312	1.89128	0.241346	0.151118
EEF1A2	0.0897212	0.174303	0.267024	0.183798	1.8756	1.94451	0.175987	0.333226
GREB1L	0.0282462	0.0831886	0.0590342	0.19728	1.50642	1.5225	0.110971	0.263226
RASIP1	0.0528758	0	0	0.0559232	1.37301	1.52536	0	0.0535166
LMX1B	0.0585731	0.0871096	0.0918002	0.0312546	1.93696	2.08679	0.170977	0.116331
GRP	0	0	0.258776	0.259318	2.76714	2.55743	0	0.248889
SEMA6A	0.11891	0.0245603	0.284315	0.218787	2.34175	2.27287	0.120163	0.0970381
SPON2	5.79268	5.83162	6.0378	6.18113	7.59781	7.56452	5.83835	5.90417
TNFRSF6B	2.87387	2.52383	2.94231	2.79264	4.50844	4.4089	3.02409	2.91273
SMC4	3.20489	3.03805	3.49129	3.41592	4.72286	4.73035	3.45026	3.64682
NGEF	0	0	0.459164	0.19012	1.67651	1.61197	0.291806	0.344115
LGALS3BP	6.08288	6.02772	6.37214	6.41532	7.8055	7.80849	6.3655	6.34335
AXIN2	0.940107	1.16049	1.69775	1.64509	3.11268	3.10295	1.48515	1.68203
HTR2B	0.651139	0.598104	1.21755	1.18157	2.61867	2.39987	0.943107	1.02815
PTGER4	0.518092	0.518398	1.19726	1.12548	2.52196	2.63749	0.694927	0.789932
MT1E	6.24053	6.15067	6.62793	6.65482	7.77676	7.88206	6.36897	6.51912
LAPTM5	0.700421	0.649443	0.310399	0	2.69138	2.86373	0.6548	0.60185
MMP11	2.59961	2.81177	1.75531	1.70599	5.43009	5.40204	2.72867	2.48835
SRPK3	0.846907	0.825953	0.268111	0.184424	1.72178	1.98573	0.40657	0.351879
PF4	0.616412	0.438955	0	0	1.79252	2.38069	0.781187	0.782007
INHBE	0.552088	0.602524	0.149819	0.150155	2.09897	1.74468	0.918596	0.274722
CCDC102B	1.02528	0.897103	0.987055	0.525679	2.13553	2.1309	0.725078	0.302778
STK32B	3.12611	2.95097	1.73456	1.68803	3.8977	3.86443	2.6391	2.56599
CHAC1	4.60779	4.40867	3.20216	3.10925	4.9148	4.99564	3.9375	4.10785
DCHS1	2.48553	2.43172	0.883289	0.893886	2.93977	3.04665	2.15541	2.2707
SLC7A5	5.33779	5.2865	4.50303	4.48464	6.66799	6.67583	5.56091	5.6138
TNS3	5.04304	5.06772	4.00647	3.91651	6.42643	6.39207	5.13086	5.19937
KIF26B	2.8713	2.96865	1.8563	1.99636	3.85172	3.8138	2.849	2.80024
CAMK2N1	4.41357	4.36632	3.58294	3.74182	5.58071	5.62732	4.78558	4.72635
NDUFA4L2	4.66408	4.61743	3.36737	3.37048	6.40189	6.29118	5.36878	5.35398
NXPH4	2.27279	1.85004	1.93587	2.07573	3.63936	3.46737	2.36934	2.64865
ARMC4	1.83408	1.4348	1.74997	1.68663	3.89686	3.74697	2.08754	2.46016
TNNT1	0.307636	0	0.170576	0.314289	1.89063	2.01765	0.783192	0.679505
PIEZO2	0.181092	0.101652	0.054539	0.0724368	1.59041	1.46653	0.503778	0.669761
PDE9A	0	0	0	0	1.76817	1.86307	0.540856	0.615446
C10orf105	0.205362	0.237086	0.374337	0.462508	2.72403	2.66875	0.966257	1.02326
NPTX1	0.122188	0.179726	0.0658178	0.159593	1.86728	1.76481	0.39258	0.441378
TBX4	0.0718255	0	0	0	1.73379	1.32829	0.550363	0.741394
ROBO2	0	0.0212893	0.210299	0.194347	3.49854	3.49185	1.57013	1.43081
RGCC	1.26833	1.72551	1.66197	1.39353	6.56616	6.43345	3.48916	3.80382
ICAM5	0	0.0584747	0.432195	0.177971	4.24294	4.26846	2.30105	2.07796
MKX	2.3343	2.40017	2.93645	2.91131	6.48464	6.48491	4.42103	4.54441
TENT5C	0.116163	0	0.339931	0.235788	2.13928	2.07952	0.934524	0.9827
ATP2B1	4.25379	4.22926	4.73109	4.73438	6.96429	6.97371	5.39889	5.38982
COL12A1	7.56262	7.56188	7.81301	7.82272	9.38947	9.40451	8.35687	8.34268
PDGFA	2.5113	2.23259	2.16068	2.16333	3.60278	3.61032	3.30156	3.25066
C3orf80	0.369978	0.314734	0.207131	0.0725656	2.25234	2.02744	1.85224	1.70881
CD82	2.68862	2.8065	2.66504	2.53067	3.93168	4.17967	3.85321	3.77428
CYB5R2	2.73381	3.00374	2.6859	2.59679	4.70164	4.64596	4.22058	4.42881
SOCS1	0.753884	1.10076	0.681778	0.787981	2.13729	2.16959	2.04347	1.62499
GPC6	2.26951	2.33889	2.1256	1.92749	3.80914	3.76582	2.69452	2.79824
APCDD1	2.3142	2.50165	1.71359	1.76087	4.50899	4.40487	3.03399	3.11227
COL11A1	2.20336	1.98964	1.19328	1.36831	6.22047	6.17523	3.63958	3.54668
KCNS3	1.44576	1.01747	1.13427	0.846873	3.10073	3.05941	2.2831	2.26842
SLC4A11	0.748594	0.443862	0.325801	0.311547	1.95825	1.77486	1.28631	1.27144
OLFML2A	1.39166	1.39244	1.07119	0.836951	2.78688	2.66556	2.01506	2.03815
IGDCC4	0.617151	0.781092	0.232656	0.159552	2.18194	2.25095	1.57177	1.52717
E2F7	0.808814	0.892807	0.807313	0.879834	2.28953	2.33303	1.34548	1.7608
TMTC2	1.21498	1.3905	1.2445	1.00221	3.77028	3.62249	2.48865	2.31841
CORIN	0.626061	0.401381	0.346919	0.441624	2.79043	3.08809	1.76032	1.74194
KCNMB2	0.0693549	0.198966	0.0731606	0.0733297	3.3975	3.36558	1.76875	1.64493
CDH2	4.66973	4.6743	4.60996	4.68618	6.84285	6.9114	5.86877	5.84843
SYT1	0	0.0772725	0.0412942	0.158894	2.93959	2.81236	1.74947	2.0416
RUNX3	1.09599	1.09653	0.993725	1.08004	2.92989	2.8817	2.36186	2.33078
ELFN1	0.808822	0.862136	0.666233	0.844751	2.73687	2.65291	1.95416	2.07372
TNFSF4	0.976207	0.96758	0.682972	0.713204	4.99619	5.02529	3.40389	3.58532
SERPINB7	3.23373	3.13539	3.18779	3.4486	5.83634	5.82357	4.85195	4.86096
LOXL4	6.21357	6.29682	5.92226	5.93401	8.72076	8.72734	7.68065	7.67616
PRR4	0	1.38575	1.76556	1.15891	1.54404	0.660791	1.93327	0
NUDT4P2	0.0247395	0.0218019	2.89361	1.10709	4.0637	1.34955	3.58955	0.0866816
COMMD3-BMI1	2.11409	2.87453	3.06188	3.57139	2.71638	2.83077	3.01813	1.46728
TICAM2	1.66033	2.65281	2.47908	2.68683	2.19764	2.77121	2.31498	0.00165799
RAB4B-EGLN2	2.43115	1.21601	0.999868	1.73207	2.16217	2.45746	2.11371	0.463687
RMRP	0	0	0	1.44243	1.38249	1.37902	1.40067	0
TMEM189-UBE2V1	0.00391322	1.15528	1.03729	0.0382062	0.00316538	2.17232	1.28585	0.00352013
JMJD7-PLA2G4B	1.30974	0.975499	0.000128538	0.511294	1.48273	0.000766744	1.58342	0.000466035
LOC100289561	1.61155	0.941557	0	1.2781	0	1.73141	1.17751	1.06198
SYNPO2	5.33877	5.34536	3.27185	3.36174	4.56192	4.50041	4.71327	4.67141
NRP2	4.30507	4.22382	2.30541	2.30003	3.50087	3.4324	3.71638	3.72237
ADM2	4.15194	4.07584	2.38181	2.04667	3.5011	3.29851	3.73387	3.72525
TRIB3	5.77333	5.87591	3.51721	3.32395	5.14558	5.04901	5.02549	5.17945
DDIT4	6.21139	6.08307	4.43334	4.18995	5.60751	5.68499	5.51758	5.48335
MTSS1L	5.90608	5.91637	4.03828	4.16007	5.23347	5.22245	4.81942	4.96191
ADRA2A	5.21169	5.21267	2.12515	2.24413	4.14599	4.13045	3.8495	3.85132
EVI2A	2.49446	2.30804	0.185894	0.545467	1.24835	1.6114	1.41536	1.71573
FBN2	6.0001	5.97535	1.7863	1.87363	5.73188	5.73018	4.33619	4.30839
SESN2	4.43737	4.35978	2.99014	2.82332	4.3162	4.22869	3.83393	3.7325
H2AFY2	3.10675	3.18407	0.992683	1.24142	3.30411	3.22963	3.03989	2.76786
SLC22A15	2.53948	2.56551	1.23407	0.921912	2.29458	2.5108	2.30297	2.21876
SERPINF1	6.52889	6.52308	4.09552	4.11418	5.11792	5.24256	5.81462	5.84115
CTSK	9.27307	9.30171	6.94852	7.08187	7.8844	7.82734	8.71177	8.71497
HEPH	4.17932	4.13425	1.75679	1.49782	2.48426	2.33461	3.28061	3.28311
LCNL1	2.65924	2.2723	0.201338	0.292991	1.13346	0.879258	1.68788	1.55472
CFD	5.26978	5.30215	2.83717	3.30101	3.34005	3.40181	4.55014	4.68873
FAM118A	3.42414	3.41354	1.81777	2.08902	2.18667	2.33463	2.81614	3.13419
TXNIP	7.52175	7.47059	3.72086	3.6388	5.39224	5.34311	5.55759	5.60064
IFITM1	7.08402	7.04852	5.45033	5.41374	6.03759	5.93021	6.09575	6.19548
KCTD15	4.16784	4.06868	2.41327	2.59059	2.77428	2.92319	3.10342	3.03961
FOS	3.5209	3.43756	1.55509	1.28787	1.66442	1.88251	2.12159	2.21907
ZNF521	3.36562	3.36421	0.828046	1.11483	1.46161	1.55525	2.10153	2.40229
PDPN	3.20338	3.33736	0.6436	0.645708	1.18618	1.34106	2.051	1.91357
CCN5	6.34417	6.34174	1.90709	1.82896	2.50624	2.61799	3.77352	3.86508
ELN	10.0677	10.0725	6.08505	6.02592	6.55992	6.57164	8.2957	8.30889
ANG	3.38532	3.67408	1.7076	2.06402	2.82322	2.13768	2.8249	3.12915
AEBP1	8.35672	8.33314	6.90385	6.94539	8.05967	8.0726	8.82998	8.83298
DPP4	6.20509	6.18265	4.45198	4.41772	6.01552	6.00096	6.59145	6.6326
HAND2	2.81562	3.02047	1.16487	1.16677	2.60484	2.41278	3.13451	3.1539
TNFAIP6	2.80247	2.54631	0.76672	1.14094	2.2506	1.77976	2.83549	2.79787
PLXNC1	1.74544	1.98209	0.58959	0.377793	1.36971	0.827402	1.95819	1.83686
MME	6.84152	6.84385	4.90205	4.84824	5.96018	5.88288	6.74381	6.70602
CBS	5.82992	5.86093	4.1071	3.98037	4.88619	4.82866	5.63774	5.54825
COL15A1	5.29778	5.32054	3.70644	3.81916	4.49262	4.47593	5.30415	5.32476
IL32	4.52562	4.35634	2.28435	2.463	3.37864	3.60912	4.21441	4.33897
TYMP	4.61725	4.6831	2.90614	2.86153	3.5885	3.79658	4.37168	4.56428
MOCOS	4.15949	4.19699	0.616023	0.94276	2.99881	2.86545	3.7111	3.9217
GDF6	2.98997	3.05545	0.469083	0.673751	1.48631	1.657	3.78708	3.73912
ADARB1	4.28402	4.14086	2.62409	2.63106	3.27329	3.2505	4.54676	4.38977
PTGDS	8.43279	8.39428	4.06187	3.99378	5.69964	5.75566	8.82948	8.80367
HLA-A	7.03098	6.98214	4.84354	4.78438	5.64512	5.48611	6.81268	6.69567
DPYSL4	2.53178	2.38791	0.706192	0.663843	1.15706	1.34646	2.52164	2.26834
DEPP1	4.27241	4.14701	1.60453	1.44139	2.36089	2.35635	3.95944	4.11628
HLA-B	7.79901	7.82554	3.56207	3.49816	4.65148	4.80957	7.83968	7.85822
HBG2	1.6522	0.385571	0	0	0.683976	0.380838	1.7975	1.35033
SMYD3	4.62865	4.70974	3.89869	3.70704	5.12233	5.10132	5.80925	5.80329
TSPYL2	3.56597	3.64529	2.75982	2.85867	4.20332	4.26805	4.58458	4.48662
CSRP2	4.62365	4.46718	3.37277	3.66194	5.21874	5.23778	5.86659	5.86409
OLFM1	3.29006	3.39189	2.07385	2.01561	3.69038	3.8027	3.60163	3.65667
PPFIBP2	2.7835	2.81874	1.51189	1.44557	3.30281	3.09855	3.19047	3.01634
PRSS23	7.87564	7.8886	6.82309	6.84803	8.09238	8.10146	8.45732	8.459
UNC5B	4.51795	4.41506	2.02344	2.03381	4.89788	4.83256	5.13533	5.08579
THBS2	7.96867	7.97238	6.3594	6.32563	8.33703	8.32573	8.67337	8.67642
CDH13	6.16514	6.079	4.4088	4.32577	6.48806	6.43475	6.7833	6.7869
DNM1	3.07862	2.94932	1.88106	2.00484	3.33635	3.24169	3.47712	3.43398
GPR153	2.80605	2.80692	1.74944	1.59483	3.08292	3.12736	3.35401	3.20336
MSX2	2.3002	1.77658	0.449778	0.315524	2.2378	2.08631	2.73567	2.56284
PRR5	4.03283	3.54253	2.42409	2.37437	4.02133	3.98619	4.2794	4.39703
GRASP	2.00401	2.19362	0.719363	1.19773	1.96363	1.81357	3.13596	2.96908
TIMP3	8.92219	8.93087	7.46239	7.46086	8.21295	8.20659	10.1793	10.1959
LRRC15	4.24348	4.30933	3.31104	3.2567	3.99274	3.93205	5.24359	5.23053
GCNT1	2.78019	2.90224	1.90293	1.88464	2.52539	2.49879	3.57199	3.51637
CADPS	1.40257	1.15259	0.360608	0.133738	1.33527	1.29691	3.29083	3.16238
KIAA1671	1.09409	0.925595	0.348179	0.375613	1.12416	1.29414	2.1288	2.02539
FNDC1	2.94898	3.01313	1.90008	1.93204	3.18625	3.09585	4.49962	4.4622
LUM	8.68926	8.70165	7.82437	7.81716	8.80675	8.83791	9.61067	9.60958
GPR75-ASB3	1.90045	1.01328	0	0.0841172	1.07097	1.6954	0.00626025	2.05313
H2BC20P	0.690596	1.50749	1.70916	0.406007	0.383039	0.683292	1.16439	2.03832
HCST	1.73232	2.03547	0	1.94145	0.820993	0	1.12052	2.1786
ACAN	7.97759	7.97104	3.56773	3.51774	0.413098	0.41183	6.73292	6.72871
C1QTNF5	6.20354	6.1756	4.99599	4.91569	4.0751	4.00101	5.67721	5.6908
SMO	2.32943	2.09611	1.35379	1.35587	0.50743	0.569946	1.96793	1.94476
C11orf96	4.1273	4.05859	2.97314	2.61453	1.50391	1.27651	3.55125	3.64007
GPX3	2.11903	2.40955	1.12259	0.959131	0.198147	0.286852	2.00183	1.86117
SVEP1	4.74519	4.71771	3.31369	3.31384	2.08589	2.02274	4.5926	4.57885
EMB	3.3561	3.27116	1.18869	1.43298	0	0.0395537	3.12867	3.01299
CCDC8	2.95636	3.07586	2.01583	1.80887	1.09399	0.988683	3.01744	2.8348
SORT1	3.36598	3.32211	2.45008	2.47267	1.94702	1.73374	3.43258	3.44987
TLR4	3.32397	3.40521	2.54707	2.52281	1.28032	1.58335	3.30618	3.37359
BAMBI	3.9365	4.00059	2.63838	2.78313	1.09159	1.32321	3.88513	3.677
PDGFRL	2.11528	2.11606	0.840168	1.28702	0.265588	0.48818	1.93328	1.67959
TNFAIP8L3	2.11195	2.05521	1.09102	1.31654	0.290604	0.637568	2.38219	2.54749
ATP10A	4.45109	4.44445	3.61092	3.52841	2.20811	2.04622	4.82547	4.85894
FBLN1	7.67926	7.67019	6.48593	6.48298	5.17901	5.11535	8.36304	8.39571
FRG1BP	2.97601	3.16451	1.86314	2.61428	1.05822	0	3.29823	3.25294
PLPP7	3.23914	3.45664	2.5946	2.34499	0.447424	0.380531	3.4209	3.28279
FAM20A	2.04424	2.08546	1.70491	1.42912	0.225061	0.356462	2.23612	2.09704
CCL2	5.58372	5.54566	4.99492	5.04835	3.14131	2.99101	5.54015	5.65155
UBL4B	2.03776	1.7264	1.56973	1.37702	0	0.121104	2.16962	2.30831
ASPN	3.55569	3.62356	2.69918	2.99419	1.16007	1.05818	3.94159	3.89038
FGF7	5.31339	5.34332	4.97446	4.97626	3.83702	3.89836	5.64641	5.54355
MEG3	5.63226	5.63878	5.32476	5.28944	3.86559	3.72382	6.03206	5.96344
MFAP3L	2.07846	2.14097	2.39847	2.06882	0.842458	0.955882	2.70985	2.6169
MTRNR2L6	2.28895	2.26078	2.35211	2.03089	0	0.132097	3.17885	3.21156
MTRNR2L10	4.79527	4.72222	4.52384	4.70769	1.90747	1.38932	5.837	5.55893
MTRNR2L12	9.8186	9.81226	9.42774	9.48108	5.60183	5.59631	10.4914	10.4779
MTRNR2L1	6.68671	6.76592	6.52098	6.60048	2.89695	2.82482	7.47713	7.50341
MTRNR2L8	8.38264	8.35386	8.09212	8.07393	4.41799	4.18129	9.10809	9.11679
DMKN	3.17035	3.51124	3.28664	3.39652	0.939457	1.30365	3.64361	3.89673
SELENOP	2.63804	2.9342	2.73306	2.66371	1.40272	1.10593	5.04728	5.03829
MFAP5	7.06041	7.00113	6.76126	6.82191	6.1361	6.18617	7.99264	7.96697
ARSB	4.12468	4.17422	4.04695	4.25587	3.1553	3.08973	4.75127	4.89112
MGP	2.10288	2.10366	1.45444	1.83417	0	0.131759	3.67349	3.67529
FST	6.21722	6.17645	5.87838	5.93966	4.00951	3.98912	7.60998	7.54255
BGN	9.26864	9.25545	8.49821	8.44072	8.26568	8.23392	9.72895	9.7318
COL4A1	6.98466	6.95614	5.98885	6.00232	5.31897	5.39404	7.9155	7.89431
MSC	3.91069	3.85674	2.92426	2.87621	2.09626	2.04965	4.67107	4.64409
PODN	6.81817	6.77452	5.96459	5.86093	5.36698	5.39515	7.32522	7.30676
APOD	2.88292	2.75602	1.57576	1.75819	1.74553	1.44739	4.04852	3.99417
DACT1	3.36576	3.37328	2.79954	2.98238	2.50197	2.55031	4.31929	4.19553
PTGIS	2.82421	2.81193	1.58047	1.57178	0.672667	0.611931	4.86313	4.89266
LTBP1	3.72351	3.55455	2.78833	2.83391	2.50913	2.4826	5.6299	5.54509
PCDH1	0.616057	0.677383	0.14604	0.0379843	0.207658	0.132936	1.66906	1.74112
MAF	1.17934	1.04092	0.0704014	0.323545	0.311101	0.348807	3.14161	3.08899
COL4A2	7.19163	7.19415	6.68101	6.71995	6.7596	6.75552	8.26063	8.25677
ITGA8	1.74042	1.95422	0.982162	0.892711	0.789466	1.10776	2.91695	3.01703
CPE	2.75983	2.68097	1.27998	1.0713	1.53917	1.63418	4.54517	4.43562
SIGLEC15	0.848438	1.10913	0.358242	0.556683	0.769691	0.337206	2.11346	1.95663
SCAMP5	2.19186	2.03933	0.74998	1.2672	1.13983	1.07548	2.4288	2.62084
RARRES2	3.47826	3.06069	0.751847	1.49987	1.64988	0.889005	4.17155	4.3068
SAA1	1.04855	1.27836	0	0.461599	0	0	1.66009	1.81716
FXYD1	2.57363	2.7989	0.760908	1.4545	1.75839	1.55907	3.49497	3.2576
HES4	2.35789	2.3048	1.19603	0.978634	1.14458	1.70551	2.49417	2.73821
PRELP	4.18573	4.19144	1.59756	1.28627	2.48802	2.44622	5.8807	5.86746
C2	2.26072	2.31951	0.348964	0.0763935	0.643828	0.797537	3.10208	3.19558
PLPP2	2.93997	2.90032	1.28205	0.9954	1.49745	1.87782	3.6758	3.76653
RETSAT	4.22634	4.36406	3.42633	3.29686	3.32146	3.5241	4.81799	4.78678
PLAU	3.28392	3.3538	2.27005	2.2387	2.07607	2.36443	3.99647	4.13052
GPC4	3.41325	3.62162	1.31986	1.28108	0.80789	0.693928	3.71417	3.51177
HTRA3	3.30987	3.2603	0.876924	1.0707	0.24087	0.219885	3.41661	3.49031
SLC1A7	2.03144	2.31279	1.22589	1.26359	0.808738	0.719403	2.26201	2.35719
FAM174B	1.71785	1.58721	0.588615	0.436692	0.191239	0.129781	1.47724	1.52765
CTSF	5.58815	5.70865	4.31983	4.15788	3.70374	3.61931	5.50643	5.38644
PPP1R14C	1.56545	1.77505	0.4492	0.51316	0.0801057	0.0798016	1.29676	1.73725
LSP1P4	2.63401	2.76345	1.15207	0.689397	1.10187	0.651617	3.15331	3.15505
SLC1A4	3.8431	3.76037	2.89967	2.71197	2.70744	2.52947	4.13058	4.02259
HLA-H	5.09866	5.18593	3.0766	3.2447	3.75124	3.31381	4.92407	4.86993
ZFY	2.34331	2.38451	0	0	0	0	2.15711	1.8818
THNSL2	3.19385	3.15549	0	0	0.116991	0	2.63956	2.66893
CERS4	3.19884	3.23319	0	0	0.191812	0.0987173	2.79702	2.68919
NLGN4Y	2.92174	2.77388	0	0	0	0	2.37565	2.60381
TTTY14	2.23093	2.77613	0	0	0.200123	0	2.08705	2.19212
PODNL1	4.26795	4.26419	2.99256	3.19159	3.0883	3.24285	4.3921	4.29543
UTY	1.53291	1.38869	0	0	0	0.0393997	1.50085	1.312
OLFM2	4.89647	4.86977	3.17277	3.06836	3.19412	3.30431	5.02346	5.03527
FMOD	4.62503	4.59464	1.83305	1.76827	1.65026	1.66361	4.76166	4.82102
KDM5D	2.67921	2.77081	0	0	0	0	2.93298	2.93051
TTTY15	1.39482	1.29099	0	0	0	0	1.33995	1.40582
USP9Y	2.11709	2.09024	0	0	0	0	2.10551	2.20707
EIF1AY	3.65231	3.68607	0	0	0.137191	0	3.61036	3.77535
DDX3Y	4.04722	4.09538	0	0	0	0.0713809	4.06347	3.93402
RPS4Y1	8.12485	8.1379	0	0	0	0	7.37883	7.41695
SYS1-DBNDD2	0	1.32847	0	3.01203	0.0767795	1.59084	1.90348	2.61078
HIST1H2BC	0.582119	2.31591	2.05313	1.6346	1.79154	1.30529	2.70653	3.17807
F2R	3.17783	3.07266	3.83577	3.79727	4.70929	4.78724	6.35792	6.33164
ZFAND5	5.15801	5.15699	5.50587	5.52277	6.01788	6.02862	6.97904	6.92598
HSD17B6	0.11348	0.113556	0.758308	0.333342	1.2498	1.29482	2.70997	2.96223
NRXN3	0.0962861	0.0197726	0.647561	0.50808	0.880407	0.944883	2.40611	2.29643
VEPH1	2.25825	2.61551	2.95893	2.82899	3.24702	3.14114	4.48192	4.1777
TSPAN13	1.84364	2.30878	2.55922	2.50819	3.14231	2.89805	3.95739	3.82524
CNKSR3	1.52305	1.78633	2.2622	2.28901	2.55756	2.75189	3.41496	3.39034
TNFAIP3	0.966196	0.868197	1.86433	1.98513	2.15285	2.26758	3.16575	3.02679
CENPV	1.14139	1.06081	1.97441	1.77649	2.03771	1.90181	2.85155	3.07844
KRT34	1.50602	1.72332	3.75197	3.5303	4.46701	4.27125	7.32046	7.21343
CRIP2	5.96823	5.97049	6.46379	6.52163	6.76626	6.68587	7.57332	7.60908
RPPH1	0	0	0	0	0.878041	0	1.43842	1.83546
CMAHP	1.8537	1.52036	1.08253	1.54029	1.95389	2.07884	2.81152	2.9834
SORBS2	1.1177	1.02572	0.0418243	0.175693	0.749176	0.631959	3.29696	3.29477
IGF2	1.05063	1.45537	0.698162	0.422575	1.46008	1.53748	6.19678	6.20251
OSBPL10	1.06771	1.27169	0.816964	0.824343	1.15875	1.05767	2.64278	2.489
ANKRD37	2.00526	2.44511	1.59028	1.67076	2.34665	2.29687	4.07724	4.11965
SEZ6L2	2.04694	2.07089	1.45889	1.61041	2.23	2.47589	4.19016	4.23925
SLC38A11	0	0	0.111548	0.111803	0.843924	0.808261	1.77981	1.81191
CYP26B1	0.309337	0.387833	0.562779	0.536266	1.39609	1.43519	2.80868	2.70359
APBA2	0.0949826	0.140344	0.323862	0.239014	1.03239	0.879537	2.10568	2.18579
NEDD1	3.08799	2.95025	2.93828	3.10244	3.75242	3.80782	4.64364	4.58862
KCNN4	0.360736	0.423458	0.443687	0.444592	1.36507	1.6971	2.98053	3.02365
ESM1	0.341095	0.180719	0.332617	0.19054	1.46282	1.96669	3.4982	3.49202
SLC14A1	0.79208	0.422302	0.322872	0.347272	1.67054	1.62161	3.49734	3.56712
SLC24A3	0.0445784	0	0	0	0.804114	0.749519	1.80997	1.93639
FAM107B	2.26757	2.01308	2.08221	1.95339	2.63789	2.60656	3.62952	3.84382
PADI2	0.152139	0.445414	0	0.0825328	1.53626	1.66328	4.56755	4.4181
PMEPA1	1.94014	2.0091	1.49875	1.67171	2.4748	2.51328	4.00501	3.94648
IFI6	5.29392	5.222	4.95197	5.10636	5.83051	5.76229	7.16132	7.11138
INA	0.78737	0.426642	0.753649	0.75504	0.93231	0.985634	2.23514	2.12599
SEMA3C	4.76907	4.80291	4.98388	4.99166	5.2121	5.29024	7.41614	7.40832
VSNL1	0.0898178	0.174486	0.267295	0.18399	0.466536	0.397162	2.01871	1.99687
KRT33B	0.220272	0.114413	0.231719	0.120781	0.494163	0.573657	3.00073	2.66532
FABP3	2.08454	2.3651	2.05306	2.10252	2.73361	2.8361	5.11087	4.98107
SLC16A6	0.0453173	0	0	0	0.396267	0.429057	1.45526	1.60184
HOXC13	0.0741906	0	0	0	0.449868	0.333822	1.54625	1.52093
HRH2	0	0	0	0	0.370208	0.368935	1.5408	1.45626
ANO1	0.0483795	0	0.0510539	0.0511729	0.978411	0.957585	4.13618	4.09045
ANKH	2.79444	2.80727	2.76524	2.83771	3.37285	3.35575	5.39722	5.37747
SERPINE1	8.18498	8.22127	9.51592	9.5114	9.37517	9.3732	10.8335	10.8274
ATP2A3	0.328601	0.268788	1.46239	1.28406	1.09753	1.00695	2.54886	2.47818
DMD	1.56739	1.52444	2.47523	2.66182	2.35982	2.26661	3.75707	3.71603
TRIB2	3.03506	2.85511	4.00987	3.90536	3.62585	3.45397	4.63087	4.61194
FHL1	6.45487	6.4505	7.67904	7.67771	7.05797	7.10493	8.43009	8.41761
DSP	4.1725	4.18778	5.53482	5.52353	4.91943	4.90814	6.40829	6.41213
LRRN3	0.0967463	0.0492067	1.92613	1.97046	1.2052	1.04335	3.10578	3.28217
RGS4	3.49508	3.43499	5.54734	5.68099	4.81829	4.73934	7.37115	7.36829
POSTN	5.54043	5.48532	6.6747	6.69321	6.18335	6.25464	7.59917	7.58571
CCN3	2.94624	3.06002	4.48916	4.39418	3.35409	3.33546	5.20955	5.17095
PLCB4	2.04423	1.93542	3.49158	3.47145	2.36989	2.51008	4.39682	4.38488
PRCD	0.697446	0.903729	1.0815	1.47354	1.30911	0.845906	2.81417	2.7499
TMEM35A	1.12296	1.24177	2.22253	1.69231	1.81473	1.73318	3.84928	4.17061
DENND3	1.43266	1.28428	1.8709	1.75851	1.56933	1.73561	3.00914	2.94122
CFH	2.4563	2.4271	3.11818	3.09039	2.95432	2.77233	4.95564	4.83757
TEK	0.273139	0.209682	1.14527	1.13105	1.0958	1.23121	3.18991	3.16369
ABI3BP	4.1155	4.08684	5.07723	5.07564	5.00203	5.005	7.73534	7.74506
CHI3L1	3.07711	3.43084	4.55157	4.56401	4.4993	4.51612	7.98821	8.01037
SUSD2	0.107882	0.302289	1.70282	1.77615	0.791344	1.20316	3.72743	3.77552
RAMP1	0.861431	1.30531	2.20909	2.06902	1.63405	1.83965	4.14419	4.28715
RIPK3	1.93734	1.77712	2.56337	2.49496	2.22376	2.21933	3.54781	3.63921
TIMP1	10.4139	10.402	11.0578	11.068	10.5427	10.5468	12.3347	12.3266
SERINC2	4.18652	3.95595	5.04436	5.02042	4.37794	4.40577	6.81789	6.7926
TGM2	4.5192	4.5148	5.5173	5.507	4.78641	4.77577	6.86049	6.87462
SERPINI1	0.632146	0.394437	0.996871	1.27135	0.208671	0.948693	2.86271	2.81635
GAL	0.265307	0	1.83147	0.891436	0	0.262087	3.2278	3.32091
UCP2	1.28947	1.03132	1.56044	1.43252	0.90641	0.841398	2.6304	2.9222
CD4	0.180075	0.288962	0.638868	0.686953	0.176999	0.1073	1.93007	1.88796
TM4SF1	1.21588	1.43994	2.18085	2.18351	0.622524	0.62055	5.54552	5.50553
PLA2G4A	0.466891	0.277917	0.990331	0.925295	0.0594371	0.170803	2.1486	2.06376
HIST1H1C	4.16219	4.34569	4.74085	4.8756	3.6468	3.93514	6.09738	6.10864
LOC100130744	1.70922	1.23462	1.88894	1.55731	1.54281	1.56257	2.97002	2.91674
CCIN	0.484568	0.792706	0.50754	0.937858	0.410894	0.728092	2.08011	1.91124
OSTN	0	0	0	0	0	0	1.47664	1.99121
SPINK6	0	0	0	0	0	0	0.907074	1.72991
ST6GALNAC2	0.31431	0.739733	0.402055	0.659806	0.31165	0.50622	2.0488	2.53736
PNMA2	0.404718	0.559367	0.306616	0.178707	0.318179	0.167226	2.07843	2.12232
PDLIM3	0.547904	0.404436	0.0798411	0.197509	0.136098	0.0747181	2.35317	2.47186
SCRG1	0.582211	0.871176	0	0	0	0.218489	3.70734	3.35429
COMP	7.4518	7.46042	7.12731	7.13294	6.46621	6.42698	10.5586	10.5586
FLG	0.750233	0.750645	0.71594	0.554263	0.328433	0.274028	2.15005	2.07376
AQP1	2.30609	2.23506	2.20614	2.16679	1.15889	0.916377	6.22773	6.15009
CACNB4	0.549956	0.474498	0.39637	0.312638	0.0638795	0	1.5938	1.62107
ANGPTL4	1.8358	2.34867	1.93562	2.03542	1.62699	1.44759	4.0419	4.09408
OPCML	0.503112	0.614901	0.604905	0.662076	0.129524	0.356955	2.36766	2.22856
PAX8	0.316431	0.275408	0.498079	0.369741	0.0850482	0.27192	1.6298	1.79176
F2RL2	0.610419	0.680215	1.07907	1.35521	1.02159	1.12957	3.9848	3.93077
RSPO4	0.0702137	0.137268	0.610548	0.560992	0.631514	0.624216	2.90813	3.07457
VEGFC	4.92585	5.04694	5.27045	5.20173	5.03004	5.10294	6.55562	6.53357
PLAT	2.28016	2.64672	3.03693	2.91792	2.73746	2.94979	5.35377	5.38048
MYZAP	0	0	0.318276	0.158187	0.147408	0	1.65439	1.88189
ALPL	0.255105	0	0.729769	0.606097	0.364465	0.405342	3.92371	4.0455
LHX2	0.210237	0.0735865	0.582182	0.7822	0.142219	0.270701	3.31244	3.25143
CYGB	2.83429	2.65769	3.24333	3.29307	2.74927	2.78157	5.55146	5.49155
NCAM1	0.084337	0.0357112	0.502885	0.513744	0.162608	0.0832485	2.11406	2.0454
PCSK1N	0.346521	0	0	0	0.34362	0.342426	2.35532	2.35689
KCNK1	0.960352	0.558978	0.953493	0.755687	0.863759	1.29758	4.22412	4.37488
WFDC1	1.58723	1.50255	1.39849	1.50369	1.74283	1.43742	3.47685	3.57112
CX3CR1	0	0	0	0.116771	0	0	1.70253	1.73916
FOXS1	0	0	0	0.150567	0	0	1.77228	1.68206
IGFBP7	9.60993	9.6012	9.74351	9.78351	9.6406	9.65519	11.063	11.0522
FNIP2	2.90372	2.95945	3.01985	3.18122	2.91171	2.94944	4.69017	4.67321
KRT14	0.216125	0.216266	0.328896	0.424613	0	0	2.63883	2.71426
ALDH1A1	0.760922	0.715098	0.154284	0.226145	0.661918	0.45316	5.32966	5.37735
SYT12	0.274779	0.316089	0.102809	0.151941	0.1872	0.312118	1.85447	1.98429
FOXE1	0	0	0	0	0	0	2.11717	2.39987
ANKRD26P1	0	0	0	0	0	0	1.28787	1.56452
NMU	0	0	0	0	0	0	2.20945	2.37954
ISM1	0	0	0	0	0	0	3.00043	3.07111
VCAM1	0	0.277994	0.0632972	0.182561	0.171489	0.223582	3.22682	3.36798
PCDH10	0	0	0.0396617	0	0	0.0732391	2.84212	2.7748
UNC13A	0.10031	0.0676885	0.0886555	0.0888591	0.0505546	0.0990229	2.89574	2.68766
EPHA5	0	0	0	0	0	0.0327191	1.62484	1.49822
MEOX2	0	0	0	0.0793146	0.14503	0.21165	2.83835	2.67894
KRT16	0	0	0	0	0.10535	0	2.53443	2.2376
RTN1	0.206988	0.152925	0.160955	0.113261	0.10623	0	1.95718	1.83867
MYH11	0.483534	0.391564	0.487773	0.329507	0.479661	0.26898	2.24665	2.19397
IGFBP2	2.81689	2.73823	2.50846	2.37882	2.06417	2.32438	10.2366	10.2146
