# Supplementary material for: Fibroblasts from different body parts exhibit distinct phenotypes in adult progeria Werner syndrome
Source: Aging (Albany NY). 2021 Feb 24;13(4):4946–61. doi: 10.18632/aging.202696 (PMC7950285; doi:10.18632/aging.202696)
Supplement: Supplementary Table 2 [file aging-13-202696-s003.xls]

## Sheet: Supplementary Table S2
Supplementary Table 2. Up-regulated genes in Foot fibroblasts. Each value is represented as log2(FPKM+1). Genes are listed in order from high to low of log2(Foot/Trunk). Cutoff: log2(Foot/Trunk) > 1 and FDR < 0.05.
			WS1-Trunk_1	WS1-Trunk_2	WS2-Trunk_1	WS2-Trunk_2	WS1-Foot_1	WS1-Foot_2	WS2-Foot_1	WS2-Foot_2
Symbol	log2(Foot/Trunk) from high to low Cutoff>1	FDR Cutoff<0.05	log2(FPKM+1)	log2(FPKM+1)	log2(FPKM+1)	log2(FPKM+1)	log2(FPKM+1)	log2(FPKM+1)	log2(FPKM+1)	log2(FPKM+1)
STMN2	5.45382	0.000418	2.01392	2.32499	2.95941	2.77052	7.29647	7.32663	8.64003	8.62101
BMP4	3.94754	5.2e-05	0.380924	0.105278	0.310256	0.214528	4.52778	4.52336	3.86583	3.88418
L1CAM	3.62317	0.000957	0.445214	0.366242	0.543919	0.532427	4.731	4.65417	3.45336	3.54194
RGCC	3.56081	0.0373	1.72551	1.26833	1.66197	1.39353	3.80382	3.48916	6.56616	6.43345
HOXA13	3.49245	1.22e-05	0.137787	0.137695	0.21247	0.39845	3.51632	3.55859	3.92938	3.8519
TNFSF4	3.41768	0.00382	0.96758	0.976207	0.682972	0.713204	3.58532	3.40389	4.99619	5.02529
BST2	3.31949	0.00831	1.99491	2.50813	1.82837	1.94795	6.33428	6.16914	4.52085	4.53304
IL7R	3.25292	0.0468	1.48283	1.0372	3.93322	3.95304	5.44453	5.48954	6.23261	6.25129
COL11A1	3.20684	0.0449	1.98964	2.20336	1.19328	1.36831	3.54668	3.63958	6.22047	6.17523
LYPD6B	3.18383	0.0287	1.01081	0.225342	3.02549	2.69134	5.1903	5.28642	4.57137	4.64023
ICAM5	3.05544	0.0207	0.0584747	0	0.432195	0.177971	2.07796	2.30105	4.24294	4.26846
FLT1	2.97952	0.00449	1.19666	1.15168	2.39979	2.69249	4.93523	4.90852	4.74936	4.76558
STXBP2	2.95806	0.000516	0.350707	0.270474	1.05936	0.957318	3.87232	3.81539	3.25392	3.52847
CADM1	2.91377	0.0136	1.98598	1.94356	0.24164	0.242167	3.66802	3.86702	4.29025	4.24314
CPNE7	2.90633	0.000388	1.57252	1.66926	2.4441	2.23555	4.7725	4.75001	5.05318	4.97104
ADRA1D	2.90497	0.00108	0.555941	0.687719	1.3718	1.57996	4.11774	4.24437	3.71147	3.74169
NTM	2.88131	0.00298	1.39256	1.50634	2.65937	2.54642	5.1724	5.03244	4.73519	4.6899
MKX	2.83819	0.0254	2.40017	2.3343	2.93645	2.91131	4.54441	4.42103	6.48464	6.48491
ENPP1	2.64121	0.00336	1.53717	1.56014	2.30197	2.3863	5.03031	4.98272	4.16186	4.17553
AMIGO2	2.61329	0.00481	2.58136	2.40477	3.20533	3.45437	5.99256	5.96404	5.0714	5.07099
SAMD5	2.47657	0.00844	0.0795906	0.0270023	0.0285064	0.0285733	3.16293	3.22151	1.84103	1.84448
SGCG	2.46629	0.00934	1.58258	1.72797	0.224613	0.419783	3.52292	3.67475	3.41108	3.21134
KCNMB2	2.44049	0.0211	0.198966	0.0693549	0.0731606	0.0733297	1.64493	1.76875	3.3975	3.36558
ROBO2	2.39135	0.042	0.0212893	0	0.210299	0.194347	1.43081	1.57013	3.49854	3.49185
ESM1	2.34369	0.0318	0.180719	0.341095	0.332617	0.19054	3.49202	3.4982	1.46282	1.96669
SYPL2	2.33404	0.0207	1.76359	1.57202	1.2219	1.0676	4.52189	4.46125	2.9799	2.99821
SYT1	2.31639	0.00336	0.0772725	0	0.0412942	0.158894	2.0416	1.74947	2.93959	2.81236
PITX1	2.29494	3.44e-05	0	0.277796	0.224306	0.419244	2.42035	2.62108	2.50594	2.55371
HOXB13	2.28755	3.33e-05	0	0.11327	0	0	2.30088	2.19911	2.18903	2.57446
COL8A2	2.25897	0.000285	3.1147	3.15888	3.52159	3.56768	5.82879	5.73143	5.4361	5.40242
LIMCH1	2.24242	0.00349	1.70567	1.93093	2.31202	2.36216	3.88651	3.92688	4.73882	4.72826
FAM155A	2.23298	0.0144	1.84649	1.68471	0.553725	0.521534	3.03681	3.07397	3.7078	3.7198
NR2F1	2.16329	0.0131	2.7408	2.72568	3.46698	3.43806	4.77045	4.64002	5.80402	5.81019
LYPD6	2.14594	0.0339	0.532615	0.700251	1.88875	2.11759	2.95884	2.99632	3.93793	3.92989
LOXL4	2.10957	0.00694	6.29682	6.21357	5.92226	5.93401	7.67616	7.68065	8.72076	8.72734
CMKLR1	2.10485	5.54e-06	0.190941	0.249199	0.32071	0.262585	2.43801	2.35816	2.25276	2.39389
SERPINB7	2.09183	0.00487	3.13539	3.23373	3.18779	3.4486	4.86096	4.85195	5.83634	5.82357
F2R	2.07564	0.0422	3.07266	3.17783	3.83577	3.79727	6.33164	6.35792	4.70929	4.78724
DKK1	2.05098	0.00862	7.44462	7.43881	8.53848	8.53625	10.1525	10.189	9.91341	9.90714
CTSB	2.04723	0.00195	8.92073	8.9023	8.91932	8.93536	11.3568	11.3573	10.5655	10.5871
PTPRB	2.02427	0.000151	0.800258	0.68961	1.11623	1.14658	2.98073	2.90231	2.96014	3.00659
LAMA1	2.00345	0.00607	0.97591	1.07927	0.512288	0.28704	3.07322	3.12563	2.34564	2.32383
COL7A1	1.99176	0.0145	1.68114	1.74292	2.97051	2.93537	4.26299	4.27188	4.3427	4.41942
COBLL1	1.95693	0.000516	1.25606	1.24227	1.65915	1.73535	3.59678	3.59097	3.25026	3.28255
SLC2A5	1.92597	0.00204	0.552205	0.910898	0.285415	0.410253	2.89016	2.47355	2.42214	2.07679
RIPOR2	1.92536	0.0168	1.24816	1.05597	2.32945	2.09798	3.88542	3.92977	3.42179	3.19602
SHROOM2	1.914	0.00336	0.02287	0.0453517	0.743838	0.843633	2.55623	2.39993	2.12208	2.23343
HOTTIP	1.90219	0.00134	0	0	0.0389689	0.15027	2.14122	2.39102	1.64672	1.61905
CORIN	1.8912	0.0168	0.401381	0.626061	0.346919	0.441624	1.74194	1.76032	2.79043	3.08809
TEX9	1.88519	0.000489	0.600304	0.853268	0.706145	0.816815	2.91924	2.82203	2.34854	2.42749
STMN3	1.87748	0.00243	2.58961	2.62015	2.27001	1.90246	4.54968	4.35747	3.98556	3.99943
FAM89A	1.86971	1.73e-05	0.922157	0.98823	1.15576	1.02966	3.01111	2.8192	2.88333	2.86104
NDUFA4L2	1.84912	0.0481	4.61743	4.66408	3.36737	3.37048	5.35398	5.36878	6.40189	6.29118
KCNN4	1.84847	0.037	0.423458	0.360736	0.443687	0.444592	3.02365	2.98053	1.36507	1.6971
TMTC2	1.83691	0.0248	1.3905	1.21498	1.2445	1.00221	2.31841	2.48865	3.77028	3.62249
TFAP2A	1.83395	0.0149	0.29251	0.436402	0.98943	1.05688	2.89626	3.08815	2.13152	1.9951
LPXN	1.76793	0.00481	5.05604	4.99111	4.35631	4.3042	6.21218	6.20522	6.66218	6.69979
CYB5R2	1.74419	0.000489	3.00374	2.73381	2.6859	2.59679	4.42881	4.22058	4.70164	4.64596
SERTAD4	1.74338	0.00366	1.15011	0.823379	1.53438	1.31831	3.22878	3.23699	2.60455	2.72938
CCDC188	1.73107	0.011	0.345452	0	0.362407	1.10096	2.00384	1.79075	2.54119	2.39734
C3orf80	1.71911	0.000437	0.314734	0.369978	0.207131	0.0725656	1.70881	1.85224	2.25234	2.02744
HOXA11	1.71116	0.000203	2.24298	2.21308	2.49555	2.08756	4.06851	4.03759	3.79832	3.97938
CDH2	1.70783	0.0125	4.6743	4.66973	4.60996	4.68618	5.84843	5.86877	6.84285	6.9114
MT2A	1.70386	0.0177	8.27228	8.30128	9.37038	9.43478	10.49	10.5425	10.5549	10.6067
SCG5	1.67355	0.00113	2.59127	2.6685	2.90036	3.21297	4.61764	4.26523	4.56312	4.62133
FAM43A	1.67323	0.0461	2.13234	2.01006	3.50368	3.42527	4.2014	4.37288	4.57218	4.61783
SERPINA9	1.64851	0.000607	0	0	0.225181	0.242518	1.48077	1.65251	1.90396	2.0245
SOCS2	1.64603	0.00613	2.22997	2.26472	2.32818	1.73579	4.14604	4.09848	3.49394	3.40434
CYP26B1	1.63683	0.041	0.387833	0.309337	0.562779	0.536266	2.70359	2.80868	1.39609	1.43519
RGS7	1.62591	0.0131	0.142045	0	0.773995	0.907602	2.18889	2.53086	1.81141	1.79611
FRY	1.62004	0.000941	1.838	1.8417	1.58954	1.59738	3.52753	3.6017	3.0958	3.12172
CSTA	1.60615	0.00504	1.8502	1.08124	1.24797	0.988791	3.0605	3.09097	2.62254	2.8188
COL13A1	1.56725	0.000219	2.43972	2.34258	2.46352	2.58179	4.15415	4.07143	3.76804	4.10301
KCNS3	1.56682	0.0114	1.01747	1.44576	1.13427	0.846873	2.26842	2.2831	3.10073	3.05941
MT1M	1.55982	0.0356	2.44318	1.57106	2.50711	3.2247	3.75193	3.90208	4.01197	4.31936
RUNX3	1.55948	0.00156	1.09653	1.09599	0.993725	1.08004	2.33078	2.36186	2.92989	2.8817
ELFN1	1.55893	0.00404	0.862136	0.808822	0.666233	0.844751	2.07372	1.95416	2.73687	2.65291
EREG	1.5493	0.00908	0	0.0735129	0.221135	0.413686	2.11571	2.12298	1.42383	1.24301
PDGFC	1.54075	0.0267	4.17639	4.19626	4.70549	4.71945	5.49691	5.47378	6.49562	6.49428
SIK1	1.5328	0.00873	1.25634	0.925674	1.27005	1.06246	3.03692	3.07578	2.26874	2.26427
INPP4B	1.53196	0.000219	1.89779	1.9432	1.96707	2.20844	3.64297	3.65525	3.44173	3.40441
CILP2	1.53152	0.000285	0.300684	0.266181	0.166455	0.243522	2.05823	1.75289	1.70717	1.58463
CSRP2	1.51542	0.0382	4.46718	4.62365	3.37277	3.66194	5.86409	5.86659	5.21874	5.23778
CHST15	1.44829	0.000388	1.91106	1.99452	2.31549	2.26875	3.55302	3.67128	3.47904	3.57963
SORCS2	1.44587	0.00336	2.2141	1.82786	1.57707	1.53835	3.36258	3.40503	3.15879	3.01447
IGDCC4	1.43534	0.012	0.781092	0.617151	0.232656	0.159552	1.52717	1.57177	2.18194	2.25095
PRAG1	1.42752	0.0299	1.35902	1.62142	2.40762	2.49619	3.13959	3.22442	3.50297	3.72734
DUSP6	1.42402	0.0381	1.15905	1.27118	2.30539	2.39508	3.31503	3.27008	3.0758	3.16586
LAMA2	1.405	0.0043	2.79967	2.77845	3.34905	3.31146	4.27743	4.30644	4.65614	4.6186
GJA1	1.39983	0.000762	7.05073	7.08082	7.3159	7.2769	8.7645	8.75018	8.41519	8.39381
IL27RA	1.39128	0.0107	0.557256	0.8105	0.431195	0.484455	2.41692	2.23732	1.63234	1.56194
DCLK2	1.37019	0.000104	1.8252	1.91729	1.76184	1.80761	3.1454	3.05835	3.32609	3.26288
TENT5C	1.36104	0.0479	0	0.116163	0.339931	0.235788	0.9827	0.934524	2.13928	2.07952
PREX1	1.35795	0.0168	0.194058	0.260422	0.846268	0.651903	1.40969	1.61096	2.21235	2.15143
MST1R	1.35515	0.00428	0.109069	0.0372466	0.11489	0.151582	1.71359	1.81087	1.12359	1.18533
ST6GALNAC5	1.34127	0.00963	1.29667	1.1391	1.71052	1.82627	2.55315	2.62818	3.09134	3.06499
KRTAP1-5	1.33774	0.0139	5.30802	5.30268	6.02868	6.04863	7.13817	7.24214	6.86424	6.79442
PHLDA2	1.31649	0.0186	3.96067	3.95971	4.84204	4.79282	5.65702	5.81871	5.61219	5.73328
SLC24A3	1.31385	0.0427	0	0.0445784	0	0	1.93639	1.80997	0.804114	0.749519
FERMT3	1.31011	0.0134	0.993494	0.881005	0.83553	0.997162	2.64692	2.61022	1.80798	1.88252
CPXM2	1.28632	0.0225	4.50452	4.48038	4.88724	4.9599	5.63299	5.57085	6.40213	6.37136
EGR2	1.28195	0.0125	1.5479	1.38205	0.68948	0.812566	2.35421	2.49571	2.22598	2.48392
GRAMD2B	1.27391	0.000957	4.52737	4.67811	5.02808	4.93649	6.1239	6.04103	6.03613	6.06463
SYNGR2	1.26983	0.00763	2.54054	2.63296	3.12273	3.04182	4.29512	4.33875	3.83099	3.95254
CD82	1.26201	0.000607	2.8065	2.68862	2.66504	2.53067	3.77428	3.85321	3.93168	4.17967
FOXF1	1.25566	0.0223	0.135108	0.198065	1.06216	0.952211	1.82073	1.66994	1.96919	1.91031
SLC38A11	1.25514	0.0324	0	0	0.111548	0.111803	1.81191	1.77981	0.843924	0.808261
COL16A1	1.23951	0.0187	5.89793	5.95407	5.14444	5.11118	6.67332	6.67046	6.84238	6.8795
IL7	1.23327	0.00308	0.920429	0.765555	0.357171	0.593163	1.91049	1.94264	1.65142	2.06485
PDE4B	1.23323	0.00403	1.31051	1.3641	1.64868	1.5198	2.86686	2.9951	2.45193	2.46209
SEL1L3	1.23046	0.000418	3.66446	3.62835	3.3247	3.35284	4.71783	4.68169	4.71811	4.77454
RASSF7	1.22709	0.0194	1.68956	1.84355	1.69918	1.36059	3.25122	3.16241	2.77464	2.31296
PCSK6	1.21199	0.000219	0	0.0398688	0	0	1.34275	1.02213	1.20474	1.3182
OLFML2A	1.20335	0.0229	1.39244	1.39166	1.07119	0.836951	2.03815	2.01506	2.78688	2.66556
COL18A1	1.1933	0.0225	4.53478	4.42229	5.13636	5.0855	5.72858	5.71378	6.24477	6.26501
NEDD1	1.17838	0.025	2.95025	3.08799	2.93828	3.10244	4.58862	4.64364	3.75242	3.80782
TSPYL2	1.1782	0.0258	3.64529	3.56597	2.75982	2.85867	4.48662	4.58458	4.20332	4.26805
PDGFA	1.17435	0.00202	2.23259	2.5113	2.16068	2.16333	3.25066	3.30156	3.60278	3.61032
LTBP2	1.16989	0.0103	6.14694	6.13774	6.44531	6.47603	7.75702	7.76541	7.16926	7.19387
AMZ1	1.16859	0.000332	0.728545	0.797879	0.482908	0.605135	1.89275	1.84506	1.71839	1.83263
SFTA1P	1.16677	0.00409	0.307143	0.306949	0.808411	0.809876	1.65999	1.65865	1.74355	1.83728
SOCS1	1.16273	0.00476	1.10076	0.753884	0.681778	0.787981	1.62499	2.04347	2.13729	2.16959
UCN2	1.16244	0.0103	0.346205	0.239619	0.738085	0.968267	1.75611	1.54497	1.94998	1.69088
TBX2	1.15393	0.0048	1.73643	1.55086	2.11975	2.0966	2.93964	2.95173	3.23335	2.99465
ZFAND5	1.15197	0.0479	5.15699	5.15801	5.50587	5.52277	6.92598	6.97904	6.01788	6.02862
SLC20A1	1.14588	0.0285	3.98925	4.13318	4.89522	4.85108	5.72561	5.74466	5.51974	5.46221
LFNG	1.12729	0.0137	2.21462	2.16803	2.87305	2.80966	3.57575	3.77017	3.50603	3.72255
OAS2	1.12149	0.00208	1.48281	1.38232	1.61376	1.72313	2.44261	2.58387	2.82259	2.83891
SLC4A11	1.11526	0.0151	0.443862	0.748594	0.325801	0.311547	1.27144	1.28631	1.95825	1.77486
ANPEP	1.09763	0.000418	7.54182	7.51192	7.71738	7.74535	8.63298	8.63743	8.8132	8.82337
E2F7	1.08502	0.0295	0.892807	0.808814	0.807313	0.879834	1.7608	1.34548	2.28953	2.33303
PRRX1	1.0829	0.00336	5.28542	5.26162	5.71742	5.73599	6.61487	6.60794	6.53099	6.57824
PTPRF	1.07896	0.00108	3.53487	3.54029	3.21178	3.25554	4.52349	4.55642	4.42688	4.35154
CDCA7L	1.07653	0.0443	3.0306	2.8709	3.74451	3.59634	4.14596	4.09818	4.64371	4.66062
MND1	1.07322	0.0318	0.392668	0.700644	0.49266	1.21384	1.61213	1.45323	1.87608	2.15126
MTUS1	1.06845	0.0116	0.34321	0.38066	0.307518	0.438506	1.63452	1.82495	1.06782	1.21641
HOTAIR	1.05959	0.000203	1.46994	1.35059	1.60324	1.55068	2.59611	2.53093	2.55966	2.5261
ITGB3	1.04194	0.0236	1.44735	1.54749	1.7748	2.06511	3.00245	3.05799	2.50823	2.43385
RGS2	1.02463	0.0132	0.683833	0.771439	1.25508	0.806129	2.19488	2.02259	1.67852	1.719
KRT15	1.01428	0.000872	0	0	0.200877	0.292342	1.23895	1.19341	1.08466	1.03331
