# Supplementary material for: Fibroblasts from different body parts exhibit distinct phenotypes in adult progeria Werner syndrome
Source: Aging (Albany NY). 2021 Feb 24;13(4):4946–61. doi: 10.18632/aging.202696 (PMC7950285; doi:10.18632/aging.202696)
Supplement: Supplementary Table 3 [file aging-13-202696-s004.xls]

## Sheet: Supplementary Table S3
Supplementary Table 3. Down-regulated genes in Foot fibroblasts. Each value is represented as log2(FPKM+1). Genes are listed in order from low to high of log2(Foot/Trunk). Cutoff: log2(Foot/Trunk) < -1 and FDR < 0.05.
			WS1-Trunk_1	WS1-Trunk_2	WS2-Trunk_1	WS2-Trunk_2	WS1-Foot_1	WS1-Foot_2	WS2-Foot_1	WS2-Foot_2
Symbol	log2(Foot/Trunk) from low to high Cutoff<-1	FDR Cutoff<0.05	log2(FPKM+1)	log2(FPKM+1)	log2(FPKM+1)	log2(FPKM+1)	log2(FPKM+1)	log2(FPKM+1)	log2(FPKM+1)	log2(FPKM+1)
KRT7	-5.20569	0.000526	5.8142	5.80326	6.95458	6.935	1.6375	1.741	0.688954	0.616839
HOXB-AS3	-4.4894	0.000216	4.98792	4.96408	4.22829	3.77729	0	0	0	0
HOXB7	-3.7532	1.22e-05	3.59261	3.88218	3.87548	4.03532	0	0	0	0.372778
CLEC3B	-3.58744	0.0154	7.34955	7.4029	5.71998	5.70868	3.52326	3.91631	2.00387	2.38789
TBX1	-3.28581	0.000219	3.74975	3.82603	3.07578	2.99612	0.169567	0.169354	0	0.165513
PSG1	-3.17837	0.0194	3.08004	3.04858	5.18551	5.19713	0.872454	0.945406	1.19825	0.78166
PEAR1	-2.99003	0.026	4.71247	4.81045	5.58181	5.56449	3.19544	3.20158	1.02285	1.28922
TCEAL7	-2.9235	0.011	3.79547	3.91239	3.71184	3.61545	1.48223	1.85892	0	0
CH25H	-2.92051	0.000872	4.08593	3.9897	3.47257	3.33354	0.846724	1.31903	0.370688	0.663256
PAMR1	-2.89888	0.00583	5.71396	5.64668	5.94451	6.03463	3.62023	3.66337	2.17683	2.28382
EMX2	-2.75352	0.00293	5.1277	5.12158	4.38696	4.30683	1.60607	1.49787	2.34645	2.47859
ADH1B	-2.72662	0.022	3.67115	3.68941	1.77541	1.77052	0	0	0	0
EMX2OS	-2.68363	0.00266	4.31327	4.31467	3.3766	3.49483	0.920669	0.8017	1.45817	1.58432
NKX2-6	-2.67446	0.000372	2.79584	3.20949	2.27331	2.64178	0	0.222576	0	0
CLU	-2.66473	6.5e-05	4.2869	4.05976	4.53991	4.61279	1.69968	1.81122	1.75382	1.5757
PPARG	-2.5756	4.75e-05	2.71011	2.61109	3.01458	2.88235	0.284008	0.272471	0	0.359251
HOXB6	-2.57421	9.97e-06	2.59321	2.73546	2.60046	2.36773	0	0	0	0
VIT	-2.56135	0.00844	4.31514	4.39223	2.98847	3.19714	0.96376	1.64723	0.905558	1.13103
PGF	-2.46954	0.000516	2.60184	2.32521	3.03345	3.06178	0.583705	0.0991322	0.188283	0.273007
ACTC1	-2.33979	0.0479	3.87108	3.80321	2.66027	2.43875	1.62311	1.65287	0.0917564	0.0464286
HOXB3	-2.30368	0.0235	3.31945	3.40873	2.69472	2.85607	0	0	1.52561	1.53862
AKR1C3	-2.19315	0.00217	5.56833	5.51202	5.4878	5.2113	3.54657	3.75554	2.91082	2.79394
ENPP2	-2.09668	0.000526	7.57692	7.55975	7.09024	7.12833	5.43624	5.44026	4.99699	5.09505
PKDCC	-2.07684	0.0412	3.75997	3.60036	2.59765	2.79036	1.80651	1.82597	0.432081	0.376433
LBH	-2.05382	0.0125	7.67682	7.67849	6.4238	6.49394	5.04024	5.12222	5.0061	4.88922
PAPPA	-1.98905	0.00069	3.30554	3.21904	3.2247	3.25378	1.60071	1.5197	0.99995	0.926504
IGF2BP3	-1.94772	4.47e-05	2.31593	2.34863	2.2993	2.3378	0.34073	0.161227	0.549338	0.459489
NLGN1	-1.93024	1.26e-05	2.37746	2.2344	2.46785	2.46391	0.454394	0.529716	0.445991	0.392565
MAN1C1	-1.8669	0.00145	3.27568	3.36876	3.0426	2.87163	0.92374	1.12844	1.37894	1.65997
CDO1	-1.86527	0.000219	2.0429	1.89072	2.24105	2.13379	0.413942	0.32066	0.11276	0
MGST1	-1.86482	0.000355	8.45935	8.49265	7.98668	8.02932	6.3973	6.38307	6.38196	6.3464
REV3L	-1.82059	0.00456	4.75406	4.6949	3.93324	3.96225	2.37076	2.3199	2.67243	2.69901
SGK1	-1.77125	0.0199	6.83162	6.83136	5.97988	6.03409	5.09011	5.07539	4.17115	4.25532
HOXB8	-1.75904	0.000242	1.62007	1.51503	1.8647	2.03638	0	0	0	0
LMOD1	-1.75007	0.0173	5.26401	5.25955	4.92641	4.92199	3.95396	3.8219	2.78141	2.8144
TGFBR3	-1.74359	0.000161	4.59161	4.60215	4.3693	4.45705	2.90561	2.89894	2.56165	2.67955
CELF2	-1.70392	0.0245	2.8256	2.82706	2.99158	2.89623	1.80034	1.78498	0.542105	0.597355
SECTM1	-1.69898	0.0299	4.42252	4.51584	3.32138	3.2549	1.95385	2.03397	2.10722	2.62369
ADA	-1.69268	0.000232	4.39617	4.49336	4.0492	4.35522	2.5489	2.7871	2.64743	2.53979
MAP6	-1.67151	0.00212	3.09875	2.83133	2.63844	2.61535	1.36561	1.3585	1.03257	0.741141
HOXB5	-1.65543	5.54e-06	1.71865	1.58662	1.67434	1.64209	0	0	0	0
SLC40A1	-1.61703	0.00877	1.8214	2.09306	2.17881	2.14391	0.947771	0.76977	0.0515211	0
IRX1	-1.61576	0.0409	3.06176	3.177	2.69321	2.55777	1.61051	2.08848	0.570502	0.757203
ADAMTS5	-1.57728	5.11e-05	3.60491	3.43656	3.57557	3.51479	1.85726	1.91849	2.12629	1.92066
PRUNE2	-1.57052	0.0427	2.45301	2.53451	1.8449	1.88738	1.32231	1.03867	0.038447	0.0382995
RARRES3	-1.55531	0.0307	2.41719	2.67155	1.45714	1.56973	0.504129	0.701813	0	0.688422
COL3A1	-1.55399	0.00308	10.397	10.4048	9.87834	9.87525	8.39071	8.38275	8.77425	8.79172
HOXD4	-1.55251	0.00399	2.47536	2.67939	2.08639	2.01081	0.515231	0.716297	1.10768	0.702691
HOXA7	-1.54778	0.0449	2.31133	2.53383	2.56697	2.29948	0.0904058	0.403714	1.40341	1.62297
ZFPM2	-1.54585	0.000223	1.76914	1.79115	1.61194	1.61424	0.285716	0.31737	0	0
PTPRN	-1.52741	0.0262	2.24213	2.16564	2.03393	1.91281	1.24059	0.957762	0.046536	0
HOXD8	-1.50749	0.0299	3.49317	3.39441	3.36525	3.5243	1.41493	1.32117	2.53877	2.4723
LURAP1L	-1.47169	0.000372	4.80276	4.81137	4.39914	4.49985	3.14824	3.11552	3.1582	3.20439
IL1R1	-1.46228	0.0399	6.07457	6.10489	4.93363	4.97856	4.25712	4.25949	3.83645	3.88948
LAMA4	-1.4393	0.000489	6.97359	6.99981	6.62445	6.6022	5.32744	5.27869	5.44291	5.39379
MSTN	-1.43885	0.0318	2.06583	1.95416	0.880426	0.918187	0.0631931	0	0	0
C3	-1.43232	0.00242	1.93268	1.90507	1.37082	1.49238	0.307472	0.439167	0.0972458	0.127778
HOXD3	-1.4275	0.00635	1.65759	2.12701	1.26286	1.26485	0.15289	0.223377	0.0768265	0.149213
SEMA3F	-1.40388	0.0295	2.50646	2.60832	2.68294	2.5558	1.67429	1.72008	0.844421	0.499218
TNFSF9	-1.38732	0.00142	2.54462	2.37783	2.22676	2.59244	0.714943	1.08472	1.17329	1.21941
ATP5MF-PTCD1	-1.38624	0.0163	0.784945	1.78649	1.35726	1.87533	0.00683819	0.00638215	0.00584606	0.240024
AP1S2	-1.37519	0.00583	4.76574	4.79632	5.43328	5.38946	3.57987	3.66235	3.73255	3.90926
INSYN1	-1.37508	0.0315	2.58215	2.64476	1.82714	1.80415	1.24574	1.1259	0.48628	0.499992
HOXB4	-1.37246	0.0199	1.33291	1.76704	2.07275	1.8257	0	0	0.808901	0.699658
TACSTD2	-1.36418	0.000372	1.84915	1.772	2.04959	2.02919	0.756718	0.460122	0.452156	0.574211
MAN1A1	-1.34655	0.00645	4.43355	4.56562	3.82717	3.92259	3.04137	2.78447	2.82854	2.70833
BMP6	-1.34171	0.0295	1.41985	1.26023	2.07052	2.30026	0.489123	0.787119	0.352128	0.0556648
HOXD9	-1.33367	0.0287	2.41658	2.41576	1.99298	2.32418	0.431223	0.572467	1.24096	1.57019
PPP1R12B	-1.32752	0.000161	2.3736	2.41297	2.20777	2.19908	1.08064	0.989034	0.853182	0.960476
MCAM	-1.32711	0.00404	2.60141	2.42297	2.60331	2.61541	0.952873	1.00663	1.67693	1.29822
RAB11FIP2	-1.3075	0.000332	3.7191	3.70293	3.39062	3.49881	2.23794	2.3367	2.17007	2.33676
SPEG	-1.29056	0.00148	4.1077	4.19273	4.34105	4.40762	3.15246	3.16422	2.69696	2.8732
PRPS1	-1.28084	0.0241	5.43972	5.42884	6.27367	6.28403	4.73106	4.77093	4.44115	4.35974
ADAM12	-1.26058	0.0299	5.97436	5.93479	6.01775	6.01666	4.25406	4.24251	5.18529	5.21938
PBX1	-1.25189	0.012	3.94285	3.99602	3.30529	3.43895	2.26958	2.1593	2.61519	2.63147
APOC1	-1.24837	0.00141	1.2375	0.92951	1.54153	1.28492	0	0	0	0
LSAMP	-1.2434	0.00717	0.934098	1.01596	1.592	1.62548	0.0710512	0.105168	0.017707	0
ALDH1B1	-1.24319	0.0173	5.36105	5.35865	4.59873	4.53712	3.85204	3.68157	3.6862	3.66297
PRSS12	-1.23846	0.00259	4.44217	4.41638	4.82339	4.93902	3.38287	3.28536	3.49201	3.50689
GASK1B	-1.22971	0.00267	4.94776	4.82816	4.45197	4.45173	3.42543	3.28692	3.59942	3.44902
TBX15	-1.22778	0.0125	3.42974	3.28539	3.50534	3.52721	2.6877	2.3664	2.03494	1.74752
MARCKSL1	-1.22741	0.0256	3.24543	3.39189	3.31304	3.22081	2.47183	2.51997	1.49656	1.77316
CASP1	-1.22564	0.00112	3.23482	2.94696	2.97657	2.94183	1.56283	1.74064	1.95566	1.93851
DUSP1	-1.21612	0.00196	5.79806	5.87414	6.11301	6.1659	4.94457	4.92752	4.58393	4.63059
LGR4	-1.21182	0.000833	3.61389	3.63442	3.36457	3.23258	2.17894	2.36437	2.2541	2.20078
PLXNB1	-1.20797	0.00502	3.50279	3.36828	3.04634	2.98779	2.22018	2.19228	1.82676	1.8341
CDK15	-1.20775	0.0196	2.10018	2.01271	1.86275	1.79938	1.21103	1.01093	0.266827	0.45525
NREP	-1.20771	0.0486	8.7078	8.70854	7.71905	7.60822	6.92367	7.01224	6.95665	7.02018
IFIT2	-1.1983	0.0392	3.7342	3.58906	3.02264	3.13355	2.64731	2.4532	1.75149	1.83425
STAT1	-1.19307	0.0492	7.9067	7.92444	7.69044	7.66373	7.12267	7.09738	6.10942	6.08357
GBP2	-1.1913	0.0407	2.40632	2.41349	2.35181	2.50473	0.727414	0.752356	1.73682	1.69455
IGSF10	-1.18813	0.00141	1.52155	1.26595	0.992301	1.4256	0.0668301	0.0665928	0.132006	0.187441
CAVIN2	-1.18737	0.00641	4.21658	4.17374	3.5494	3.68919	2.80657	2.72338	2.64743	2.70204
GABBR2	-1.1827	0.0272	1.55964	1.48619	1.97482	2.1512	0.878526	1.00348	0.219209	0.339837
CXCL1	-1.16837	0.00112	1.35649	1.21387	1.09788	1.47417	0	0	0.307574	0.161336
TCF7L2	-1.1626	0.00824	4.42622	4.3484	3.93164	3.83311	3.13376	3.15252	2.83973	2.76295
DIPK1A	-1.1621	0.000161	5.05212	5.07324	4.95719	4.91533	3.8749	3.93531	3.70638	3.83291
RABGAP1	-1.15689	4.82e-05	4.88617	4.85906	4.76337	4.74348	3.60945	3.71868	3.62886	3.66755
EBF1	-1.14357	0.00277	3.42844	3.36209	3.40892	3.42996	2.53633	2.37728	1.91188	2.22962
EPHB6	-1.13691	0.0172	1.65459	1.53922	2.13698	2.06303	0.469143	0.548636	1.14912	0.679268
TENT5B	-1.13444	0.00357	2.22672	2.39628	2.09277	1.80044	0.811876	1.05506	1.00236	1.10913
LDLR	-1.12726	0.00406	4.58342	4.63412	4.38137	4.52487	3.11268	3.24176	3.67426	3.58606
PLEKHG4	-1.12711	0.014	3.74159	3.67939	3.9671	3.90879	2.40476	2.34341	3.0467	2.99357
EPHX1	-1.11186	0.000796	5.94541	5.88027	5.61136	5.68608	4.73755	4.6241	4.77433	4.53969
APOL3	-1.08675	0.0276	3.15759	3.26066	2.70828	2.50846	2.07136	2.08009	1.54096	1.59555
PTGS1	-1.08214	0.0468	4.00847	3.89016	3.79014	3.9244	3.23763	3.31269	2.42321	2.31107
FOXD1	-1.08073	0.00136	5.42651	5.34425	5.13818	5.19155	4.09705	4.01658	4.36441	4.29952
TSHZ2	-1.0792	0.00394	1.93731	1.81875	1.67223	1.68555	0.515768	0.472899	0.832242	0.976141
LINC02381	-1.06987	0.0281	4.65614	4.77777	3.86283	4.09171	3.43796	3.19441	3.15273	3.32383
GRK5	-1.06855	0.0174	3.62168	3.61497	4.14242	4.20382	2.74856	2.52829	2.97509	3.05677
TBC1D8	-1.06461	0.00481	2.50242	2.44054	1.96786	2.01542	1.26028	1.12828	1.13166	1.14757
PRKD1	-1.04752	0.000438	4.2775	4.24395	4.00796	4.09093	3.20556	3.15012	3.03398	3.0406
KCND2	-1.04444	0.0456	1.51092	1.4756	1.52666	1.6101	0.865215	0.985527	0.063039	0.0317409
FEZ1	-1.03449	0.00311	4.96441	5.10322	5.08577	5.02052	4.19441	4.23429	3.82711	3.78017
ABCA6	-1.03238	0.00135	1.63846	1.28131	1.60349	1.61713	0.522839	0.451346	0.394975	0.641698
GLIS3	-1.03004	0.000516	1.88174	1.76477	1.87348	1.91316	0.888289	0.659187	0.773481	0.992043
FNBP1L	-1.02148	0.0429	2.51455	2.62191	2.3654	2.54389	1.82939	1.9753	1.039	1.11615
RRAS2	-1.02101	0.00262	6.2298	6.26002	6.46808	6.44097	5.19301	5.12676	5.48948	5.50559
AR	-1.01054	0.000372	1.48603	1.26541	1.47339	1.49943	0.438571	0.307377	0.446211	0.489941
