# Supplementary material for: Fibroblasts from different body parts exhibit distinct phenotypes in adult progeria Werner syndrome
Source: Aging (Albany NY). 2021 Feb 24;13(4):4946–61. doi: 10.18632/aging.202696 (PMC7950285; doi:10.18632/aging.202696)
Supplement: Supplementary Table 4 [file aging-13-202696-s005.xls]

## Sheet: Supplementary Table S4
Supplementary Table 4. Clinical characteristics of the patients.
	Age	Sex	Ethnicity	WRN gene mutation	Progeroid changes of hair (Gray hair, alopecia, etc.)	Cataract (Bilateral)	Changes of skin, Intractable skin ulcers (Atrophic skin, tight skin, clavus, callus)	Amputation	Soft-tissue calcification (Achilles tendon, etc)	Bird-like face	Abnormal voice (High pitched, squeaky, hoarse voice)	Abnormal glucose and/or lipid metabolism	Deformation and abnormality of the bone (Osteoporosis, etc)	Malignant tumors (Non-epithelial tumors, thyroid cancer, etc)	Parental consanguinity	Premature atherosclerosis (Angina pectoris, myocardial infarction)	Hypogonadism	Short stature and low bodyweight
WS1	43yr Diagnosed, 43yr	Male	Japanese	c.[3139-1G>C; 3139-1G>C]	Gray hair, alopecia, 41yr	Bilateral, 25yr	Ulcer, right second toe, 41yr, right first toe, 43yr	None	Achilles tendon	+	+	Insulin resistance, dyslipidemia, 43yr	Foot deformity (callus), bone density reduction	None	None	Severe right lower limb ischemia (endovascular treatment)	None	+
WS2	47yr Diagnosed, 47yr	Female	Japanese	c.[3139-1G>C; 3913C>T]	Alopecia, 43yr	Bilateral, 32yr	Ulcer, right Achilles tendon, 40yr, left dorsum of foot, 47yr	None	Achilles tendon	+	+	Diabate (diet therapy), dyslipidemia, 48yr	Foot deformity (flat foot), osteoporosis	Thyroid cancer, 48yr, meningioma 49yr	None	Aortic valve stenosis, 48yr	None	+
